# Supplementary material
Source: PubMed Central journal article supplement (PMC6792093)
Supplement: djz098_supplementary_data.pdf [file djz098_supplementary_data.pdf]

**SUPPLEMENTARY MATERIALS**

**Supplementary Tables**

**Supplementary Table 1. Trend in colorectal cancer incidence rates among adults 20-49 years by state and subsite, all races**

| State                 | Available years | Number of cases | 10 year AAPC 2006-2015 (95% CI) |                  |                  |
|-----------------------|-----------------|-----------------|---------------------------------|------------------|------------------|
|                       |                 |                 | CRC                             | Colon            | Rectum           |
| Alabama               | 1998 - 2015     | 4,299           | 1.1* (0.3, 1.9)                 | 0.7 (-0.2, 1.6)  | 1.9* (0.7, 3.0)  |
| Alaska                | 1996 - 2015     | 632             | 2.2* (0.6, 3.9)                 | 2.3 (-0.0, 4.6)  | 2.2* (0.0, 4.5)  |
| Arizona               | 1995 - 2015     | 4,064           | 1.6* (0.8, 2.3)                 | -1.6 (-5.6, 2.6) | 2.2* (1.3, 3.1)  |
| Arkansas              | 2001 - 2015     | 2,082           | 2.0* (0.6, 3.5)                 | 2.8 (-3.8, 9.9)  | 3.5* (1.8, 5.3)  |
| California            | 1995 - 2015     | 28,041          | 1.5* (1.3, 1.8)                 | 1.2* (0.9, 1.5)  | 2.1* (1.6, 2.5)  |
| Colorado              | 1995 - 2015     | 3,408           | 2.1* (1.5, 2.6)                 | 1.0* (0.2, 1.8)  | 3.8* (2.9, 4.7)  |
| Connecticut           | 1995 - 2015     | 3,158           | 1.3* (0.6, 2.0)                 | 0.7 (-0.0, 1.4)  | 2.2* (1.0, 3.4)  |
| Delaware              | 1995 - 2015     | 804             | 1.5 (-0.0, 3.0)                 | 1.8* (0.2, 3.5)  | 1.2 (-1.1, 3.5)  |
| District of Columbia† | 1997 - 2014     | 507             | 0.6 (-0.9, 2.0)                 | 0.3 (-2.0, 2.8)  | ‡                |
| Florida               | 1995 - 2015     | 16,406          | -0.0 (-0.4, 0.4)                | 0.2 (-0.3, 0.6)  | 0.6* (0.1, 1.2)  |
| Georgia               | 1997 - 2015     | 8,533           | 1.3* (0.8, 1.7)                 | 0.6* (0.0, 1.2)  | 2.2* (1.3, 3.2)  |
| Hawaii                | 1995 - 2015     | 1,421           | 1.2* (0.3, 2.1)                 | 1.1 (-0.5, 2.7)  | 1.4* (0.2, 2.7)  |
| Idaho                 | 1995 - 2015     | 956             | 2.4* (1.2, 3.7)                 | 2.1* (0.8, 3.4)  | 2.8* (0.9, 4.8)  |
| Illinois              | 1995 - 2015     | 11,166          | 1.0* (0.6, 1.4)                 | 0.4* (0.0, 0.8)  | 1.8* (1.2, 2.4)  |
| Indiana               | 1998 - 2015     | 4,939           | 1.7* (1.0, 2.3)                 | 1.0* (0.2, 1.8)  | 2.7* (1.7, 3.6)  |
| Iowa                  | 1995 - 2015     | 2,554           | 2.4* (1.5, 3.3)                 | 1.9* (0.9, 3.0)  | 3.1* (1.9, 4.2)  |
| Kentucky              | 1995 - 2015     | 4,700           | 1.3* (0.8, 1.8)                 | 0.6 (-0.0, 1.1)  | 2.4* (1.5, 3.3)  |
| Louisiana             | 1995 - 2015     | 4,648           | 1.6* (0.8, 2.4)                 | 0.5 (-0.0, 1.1)  | 2.2* (1.3, 3.2)  |
| Maine                 | 1995 - 2015     | 1,106           | 1.4* (0.3, 2.6)                 | 1.4 (-0.1, 2.8)  | 1.5 (-0.0, 3.0)  |
| Massachusetts         | 1997 - 2015     | 5,396           | 1.8* (1.1, 2.5)                 | 1.1* (0.4, 1.8)  | 2.7* (1.7, 3.7)  |
| Michigan              | 1995 - 2015     | 8,589           | 1.7* (1.3, 2.2)                 | 1.4* (0.8, 2.0)  | 2.1* (1.4, 2.8)  |
| Mississippi           | 2004 - 2015     | 1,928           | -1.0 (-2.3, 0.4)                | -0.5 (-2.4, 1.4) | -1.5 (-4.3, 1.3) |
| Missouri              | 1998 - 2015     | 4,769           | 0.5 (-0.1, 1.1)                 | 0.0 (-0.8, 0.8)  | 1.2* (0.3, 2.1)  |
| Montana               | 1996 - 2015     | 700             | 1.7* (0.3, 3.2)                 | 1.1 (-0.5, 2.7)  | 2.3* (0.4, 4.3)  |
| Nebraska              | 1995 - 2015     | 1,476           | 1.8* (0.9, 2.7)                 | 1.4* (0.2, 2.7)  | 2.4* (0.8, 3.9)  |
| Nevada§               | 1997 - 2010     | 1,234           | 2.8* (1.7, 3.8)                 | 1.9* (0.3, 3.6)  | 4.2* (2.3, 6.1)  |
| New Hampshire         | 1999 - 2015     | 1,021           | 2.0* (0.2, 3.8)                 | 1.9 (-0.2, 4.0)  | 2.0 (-0.1, 4.2)  |
| New Jersey            | 1995 - 2015     | 8,098           | 1.1* (0.6, 1.5)                 | 0.6* (0.1, 1.1)  | 1.8* (1.0, 2.5)  |
| New Mexico¶           | 1995 - 2012     | 1,228           | 3.5* (2.0, 5.1)                 | 2.5* (0.7, 4.3)  | ‡                |
| New York              | 1995 - 2015     | 17,280          | 1.6* (1.3, 1.9)                 | 0.9* (0.6, 1.3)  | 2.5* (2.1, 3.0)  |
| North Carolina        | 1995 - 2015     | 8,682           | 0.0 (-0.8, 0.8)                 | 0.2 (-0.3, 0.7)  | 2.4* (1.7, 3.1)  |
| North Dakota          | 1998 - 2015     | 461             | 3.0* (1.4, 4.6)                 | 0.9 (-1.5, 3.4)  | ‡                |
| Ohio                  | 1997 - 2015     | 9,375           | 1.8* (1.3, 2.2)                 | 1.2* (0.8, 1.7)  | 2.6* (1.9, 3.2)  |
| Oklahoma              | 1997 - 2015     | 3,217           | 2.1* (1.2, 3.0)                 | 1.7* (0.7, 2.7)  | -0.6 (-4.2, 3.1) |
| Oregon                | 1996 - 2015     | 2,706           | 1.9* (1.3, 2.6)                 | 1.5* (0.5, 2.4)  | 2.6* (1.4, 3.8)  |
| Pennsylvania          | 1995 - 2015     | 11,623          | 1.5* (1.1, 1.8)                 | 0.6* (0.1, 1.1)  | 2.0* (1.4, 2.6)  |

|                |             |         |                  |                  |                  |
|----------------|-------------|---------|------------------|------------------|------------------|
| Rhode Island   | 1995 - 2015 | 953     | 0.5 (-0.7, 1.7)  | -1.3 (-2.9, 0.3) | 2.9* (1.3, 4.6)  |
| South Carolina | 1997 - 2015 | 4,221   | -0.1 (-0.9, 0.8) | 1.1 (-1.8, 4.1)  | 0.4 (-0.7, 1.4)  |
| South Dakota   | 2001 - 2015 | 484     | 1.5 (-1.1, 4.3)  | 1.0 (-1.8, 3.8)  | 2.4 (-1.2, 6.0)  |
| Tennessee      | 2004 - 2015 | 3,776   | 1.0* (0.4, 1.6)  | 1.0 (-0.5, 2.4)  | 0.9 (-0.8, 2.7)  |
| Texas          | 1995 - 2015 | 20,091  | 0.8* (0.5, 1.0)  | 0.6* (0.3, 0.9)  | 1.0* (0.6, 1.5)  |
| Utah           | 1995 - 2015 | 1,660   | 2.3* (1.6, 3.1)  | 1.3* (0.0, 2.7)  | 3.7* (2.6, 4.7)  |
| Vermont        | 1996 -2015  | 509     | 1.7 (-0.0, 3.5)  | -0.0 (-2.1, 2.1) | ‡                |
| Virginia#      | 1998 - 2015 | 5,810   | 0.6 (-0.1, 1.3)  | 0.0 (-0.8, 0.8)  | -0.4 (-1.7, 1.1) |
| Washington     | 1995 - 2015 | 5,184   | 2.1* (1.4, 2.7)  | 1.9* (1.0, 2.7)  | 2.3* (1.4, 3.2)  |
| West Virginia  | 1995 - 2015 | 1,984   | 3.2* (0.4, 6.1)  | 3.2 (-4.0, 10.9) | 2.1* (0.9, 3.3)  |
| Wisconsin      | 1995 - 2015 | 4,645   | 1.0* (0.4, 1.6)  | 0.5 (-0.3, 1.3)  | 1.9* (1.0, 2.7)  |
| Wyoming        | 1995 - 2015 | 391     | 1.8 (-0.1, 3.7)  | 1.3 (-0.8, 3.3)  | ‡                |
| US             | 1995 - 2015 | 240,915 | 1.1* (0.3, 2.0)  | 0.7* (0.5, 0.9)  | 1.7* (1.4, 2.0)  |

\*Indicates AAPC is statistically significantly different from zero ( $P < 0.05$ ) using a 2-sided test based on the permutation method. AAPC = Average Annual Percent Change; CI = confidence interval

†Data unavailable for 2002; AAPC reflects data during 2005-2014.

‡ <6 cases in 1 or more years.

§AAPC during 2001-2010.

¶AAPC during 2003-2012.

#Data unavailable for 2001.

**Supplementary Table 2. Trend in colorectal cancer incidence rates among adults 20-49 years by state and subsite, non-Hispanic white**

| State                 | Available years | Number of cases | AAPC 2006-2015 (95% CI) |                  |                  |
|-----------------------|-----------------|-----------------|-------------------------|------------------|------------------|
|                       |                 |                 | CRC                     | Colon            | Rectum           |
| Alabama               | 1998 - 2015     | 2,907           | 1.4* (0.4, 2.4)         | 1.4* (0.2, 2.7)  | 1.3 (-0.0, 2.7)  |
| Alaska                | 1996 - 2015     | 373             | 1.6 (-0.5, 3.7)         | 2.2 (-0.5, 5.0)  | †                |
| Arizona               | 1995 - 2015     | 2,560           | 1.9* (0.9, 2.8)         | 1.4* (0.3, 2.6)  | 2.5* (1.4, 3.6)  |
| Arkansas              | 2001 – 2015     | 1,577           | 2.3* (0.5, 4.1)         | 1.4 (-0.6, 3.5)  | 3.8* (1.6, 6.0)  |
| California            | 1995 - 2015     | 13,658          | 2.1* (1.8, 2.4)         | 1.5* (1.1, 2.0)  | 2.9* (2.3, 3.6)  |
| Colorado              | 1995 - 2015     | 2,505           | 2.6* (2.1, 3.1)         | 1.5* (0.8, 2.3)  | 4.2* (3.2, 5.2)  |
| Connecticut           | 1995 - 2015     | 2,349           | 1.7* (0.9, 2.5)         | 0.9 (-0.1, 1.9)  | 2.8* (1.5, 4.1)  |
| Delaware              | 1995 - 2015     | 557             | 1.8* (0.1, 3.6)         | 2.2* (0.4, 4.1)  | †                |
| District of Columbia† | 1997 - 2014     | 116             | †                       | †                | †                |
| Florida               | 1995 - 2015     | 9,935           | 0.9* (0.5, 1.3)         | 1.0* (0.5, 1.6)  | 1.3* (0.7, 2.0)  |
| Georgia               | 1997 - 2015     | 4,969           | 2.0* (1.3, 2.6)         | 1.2* (0.3, 2.0)  | 3.0* (2.0, 4.0)  |
| Hawaii                | 1995 - 2015     | 286             | 1.8 (-0.1, 3.6)         | †                | †                |
| Idaho                 | 1995 - 2015     | 853             | 2.8* (1.6, 4.1)         | 2.6* (1.3, 3.8)  | 3.0* (0.8, 5.2)  |
| Illinois              | 1995 - 2015     | 7,600           | 1.4* (0.9, 1.8)         | 0.8* (0.3, 1.3)  | 2.1* (1.5, 2.7)  |
| Indiana               | 1998 - 2015     | 4,177           | 2.1* (1.3, 2.8)         | 1.5* (0.8, 2.2)  | 2.9* (1.8, 4.0)  |
| Iowa                  | 1995 - 2015     | 2,375           | 2.6* (1.7, 3.5)         | 2.2* (1.2, 3.3)  | 2.5* (1.4, 3.6)  |
| Kentucky              | 1995 - 2015     | 4,175           | 1.6* (1.1, 2.1)         | 0.8* (0.1, 1.5)  | 2.8* (2.0, 3.6)  |
| Louisiana             | 1995 - 2015     | 2,845           | 1.6* (0.7, 2.5)         | 1.0* (0.1, 1.9)  | 2.3* (1.2, 3.5)  |
| Maine                 | 1995 - 2015     | 1,064           | 1.4* (0.2, 2.6)         | 1.2 (-0.2, 2.7)  | 1.5 (-0.1, 3.2)  |
| Massachusetts         | 1997- 2015      | 4,308           | 2.1* (1.4, 2.7)         | 1.3* (0.6, 2.0)  | 3.1* (2.0, 4.1)  |
| Michigan              | 1995 - 2015     | 6,537           | 2.1* (1.6, 2.5)         | 1.6* (1.0, 2.3)  | 2.6* (1.8, 3.4)  |
| Mississippi           | 2004 - 2015     | 1,061           | -0.5 (-1.8, 0.9)        | -0.1 (-1.4, 1.3) | -1.0 (-4.2, 2.3) |
| Missouri              | 1998 - 2015     | 3,964           | 0.9* (0.3, 1.6)         | 0.6 (-0.3, 1.5)  | 1.4* (0.5, 2.2)  |
| Montana               | 1996 - 2015     | 612             | 1.9* (0.5, 3.4)         | 1.3 (-0.4, 3.1)  | 2.6* (0.6, 4.5)  |
| Nebraska              | 1995 - 2015     | 1,274           | 2.0* (1.0, 3.0)         | 1.5* (0.3, 2.7)  | 2.7* (1.2, 4.2)  |
| Nevada‡               | 1997- 2010      | 813             | 2.8* (1.0, 4.8)         | 2.0* (0.3, 3.7)  | 4.2* (0.7, 7.9)  |
| New Hampshire         | 1999 - 2015     | 964             | 2.6* (0.8, 4.5)         | 2.9* (0.8, 5.1)  | 2.3* (0.1, 4.5)  |
| New Jersey            | 1995 - 2015     | 5,140           | 1.8* (1.2, 2.3)         | 1.3* (0.7, 1.9)  | 2.5* (1.5, 3.4)  |
| New Mexico¶           | 1995 - 2012     | 540             | 3.8* (1.8, 5.7)         | 2.2* (0.7, 3.6)  | †                |
| New York              | 1995 - 2015     | 10,438          | 1.6* (1.3, 2.0)         | 1.0* (0.6, 1.4)  | 2.5* (1.9, 3.2)  |
| North Carolina        | 1995 - 2015     | 5,838           | 1.4* (1.0, 1.8)         | 0.5 (-0.1, 1.1)  | 2.6* (1.9, 3.2)  |
| North Dakota          | 1998 - 2015     | 419             | 3.1* (1.4, 4.9)         | 1.2 (-1.3, 3.8)  | †                |
| Ohio                  | 1997 - 2015     | 7,669           | 1.9* (1.4, 2.3)         | 1.3* (0.8, 1.9)  | 2.7* (2.0, 3.4)  |
| Oklahoma              | 1997 - 2015     | 2,283           | 2.2* (1.0, 3.3)         | 1.8* (0.3, 3.2)  | 2.8* (1.0, 4.7)  |
| Oregon                | 1996 - 2015     | 2,244           | 2.1* (1.4, 2.8)         | 1.6* (0.6, 2.7)  | 2.7* (1.4, 4.0)  |
| Pennsylvania          | 1995 - 2015     | 9,427           | 1.7* (1.3, 2.1)         | 2.2* (0.0, 4.3)  | 2.1* (1.4, 2.8)  |
| Rhode Island          | 1995 - 2015     | 784             | -3.9 (-9.5, 2.0)        | -1.1 (-2.5, 0.4) | 2.8* (0.6, 5.1)  |
| South Carolina        | 1997 - 2015     | 2,641           | 0.7 (-0.3, 1.6)         | 0.3 (-0.6, 1.3)  | 1.1 (-0.2, 2.5)  |
| South Dakota          | 2001 - 2015     | 424             | 1.6 (-1.1, 4.4)         | 1.1 (-1.8, 4.0)  | 2.4 (-1.2, 6.2)  |
| Tennessee             | 2004 - 2015     | 2,885           | 1.9* (1.1, 2.7)         | 2.0* (0.2, 3.8)  | 1.6 (-0.9, 4.1)  |
| Texas                 | 1995 - 2015     | 10,621          | 1.8* (1.5, 2.2)         | 1.5* (1.0, 1.9)  | 2.3* (1.8, 2.9)  |
| Utah                  | 1995 - 2015     | 1,390           | 2.6* (1.8, 3.3)         | 1.5* (0.2, 2.7)  | 4.1* (3.0, 5.2)  |

|               |             |         |                 |                  |                 |
|---------------|-------------|---------|-----------------|------------------|-----------------|
| Vermont       | 1996 -2015  | 498     | 1.8 (-0.1, 3.7) | 0.0 (-2.3, 2.4)  | †               |
| Virginia#     | 1998 - 2015 | 3,853   | 1.5* (0.7, 2.3) | 0.9* (0.1, 1.7)  | 2.3* (1.2, 3.4) |
| Washington    | 1995 - 2015 | 4,024   | 2.6* (2.0, 3.2) | 2.4* (1.7, 3.1)  | 2.8* (1.7, 3.9) |
| West Virginia | 1995 - 2015 | 1,886   | 3.6* (0.6, 6.6) | 4.1 (-3.2, 11.9) | 2.3* (1.1, 3.6) |
| Wisconsin     | 1995 - 2015 | 3,937   | 1.1* (0.4, 1.8) | 0.6 (-0.3, 1.5)  | 1.9* (0.9, 2.8) |
| Wyoming       | 1995 - 2015 | 358     | 1.9* (0.1, 3.8) | 1.7 (-0.3, 3.8)  | †               |
| US            | 1995 - 2015 | 161,713 | 1.6* (1.5, 1.8) | 1.7* (0.9, 2.5)  | 2.2* (1.8, 2.6) |

\*Indicates AAPC is statistically significantly different from zero ( $P < 0.05$ ) using a 2-sided test based on the permutation method. AAPC = Average Annual Percent Change; CI = confidence interval

†<6 cases in 1 or more years.

‡ Data unavailable for 2002; AAPC reflects data during 2005-2014.

§AAPC during 2001-2010.

¶AAPC during 2003-2012.

#Data unavailable for 2001.

**Supplementary Table 3. Pairwise comparison between states in the joinpoint regression function (i.e., slope of the trend) for colorectal cancer incidence trends among non-Hispanic whites 20-49 years from 1995-2015 (ranked from largest to smallest difference)**

| <b>Cohort 1</b> | <b>Cohort 2</b> | <b>P-Value*</b> |
|-----------------|-----------------|-----------------|
| Colorado        | New York        | <.001           |
| Colorado        | North Carolina  | <.001           |
| California      | Florida         | <.001           |
| Colorado        | Florida         | 0.001           |
| California      | Illinois        | 0.001           |
| North Carolina  | Washington      | 0.001           |
| Colorado        | Illinois        | 0.001           |
| Colorado        | Wisconsin       | 0.001           |
| California      | North Carolina  | 0.001           |
| Florida         | Washington      | 0.002           |
| Pennsylvania    | Washington      | 0.002           |
| Washington      | Wisconsin       | 0.002           |
| Kentucky        | Washington      | 0.003           |
| Utah            | Wisconsin       | 0.004           |
| Colorado        | Kentucky        | 0.004           |
| Florida         | Utah            | 0.005           |
| Colorado        | Pennsylvania    | 0.005           |
| Colorado        | Rhode Island    | 0.006           |
| Louisiana       | Washington      | 0.007           |
| Florida         | Iowa            | 0.007           |
| Illinois        | Washington      | 0.008           |
| California      | Rhode Island    | 0.009           |
| Idaho           | Wisconsin       | 0.010           |
| Delaware        | Illinois        | 0.011           |
| California      | West Virginia   | 0.012           |
| North Carolina  | Utah            | 0.012           |
| Florida         | Michigan        | 0.013           |
| Florida         | Nebraska        | 0.013           |
| Iowa            | North Carolina  | 0.013           |
| New York        | Washington      | 0.013           |
| California      | Wisconsin       | 0.014           |
| Illinois        | Iowa            | 0.015           |
| Florida         | Texas           | 0.017           |
| West Virginia   | Wyoming         | 0.017           |
| Kentucky        | Utah            | 0.017           |
| New York        | Rhode Island    | 0.018           |
| Michigan        | Wisconsin       | 0.018           |
| Pennsylvania    | Utah            | 0.019           |
| Iowa            | Rhode Island    | 0.019           |
| Delaware        | Florida         | 0.020           |
| Colorado        | New Jersey      | 0.021           |

|                |                |       |
|----------------|----------------|-------|
| Idaho          | Illinois       | 0.021 |
| Colorado       | Texas          | 0.021 |
| California     | New York       | 0.022 |
| New York       | Utah           | 0.022 |
| Idaho          | North Carolina | 0.022 |
| Illinois       | Utah           | 0.023 |
| Michigan       | Rhode Island   | 0.024 |
| Illinois       | Michigan       | 0.026 |
| Iowa           | Wisconsin      | 0.026 |
| Connecticut    | Rhode Island   | 0.029 |
| Michigan       | North Carolina | 0.029 |
| Colorado       | West Virginia  | 0.030 |
| North Carolina | Texas          | 0.031 |
| North Carolina | Rhode Island   | 0.032 |
| Iowa           | New York       | 0.033 |
| Colorado       | Maine          | 0.035 |
| New Jersey     | Rhode Island   | 0.036 |
| Iowa           | Kentucky       | 0.039 |
| Nebraska       | Rhode Island   | 0.039 |
| Idaho          | New York       | 0.041 |
| Texas          | Washington     | 0.042 |
| Delaware       | West Virginia  | 0.042 |
| Arizona        | Wisconsin      | 0.043 |
| Louisiana      | West Virginia  | 0.043 |
| Florida        | Idaho          | 0.043 |
| Florida        | New York       | 0.045 |
| Idaho          | Pennsylvania   | 0.045 |
| Hawaii         | Rhode Island   | 0.045 |
| Nebraska       | West Virginia  | 0.047 |
| Maine          | Washington     | 0.050 |
| New Jersey     | North Carolina | 0.055 |
| Rhode Island   | Texas          | 0.062 |
| Idaho          | Rhode Island   | 0.063 |
| Michigan       | New York       | 0.063 |
| Idaho          | Kentucky       | 0.063 |
| Iowa           | West Virginia  | 0.064 |
| Pennsylvania   | Wisconsin      | 0.067 |
| Kentucky       | Rhode Island   | 0.068 |
| California     | Kentucky       | 0.068 |
| Rhode Island   | Utah           | 0.070 |
| Colorado       | Louisiana      | 0.072 |
| Michigan       | West Virginia  | 0.073 |
| Iowa           | Pennsylvania   | 0.074 |
| New York       | North Carolina | 0.075 |
| North Carolina | West Virginia  | 0.075 |
| Colorado       | Connecticut    | 0.076 |

|              |                |       |
|--------------|----------------|-------|
| Florida      | Rhode Island   | 0.081 |
| Maine        | West Virginia  | 0.084 |
| New Jersey   | Washington     | 0.084 |
| Colorado     | Michigan       | 0.089 |
| Rhode Island | Washington     | 0.091 |
| Iowa         | Texas          | 0.100 |
| Nebraska     | North Carolina | 0.101 |
| Illinois     | Texas          | 0.103 |
| Louisiana    | Rhode Island   | 0.105 |
| Idaho        | New Jersey     | 0.106 |
| Rhode Island | West Virginia  | 0.107 |
| Connecticut  | Washington     | 0.107 |
| Iowa         | New Jersey     | 0.108 |
| Louisiana    | Maine          | 0.112 |
| Utah         | West Virginia  | 0.114 |
| California   | New Jersey     | 0.115 |
| California   | Connecticut    | 0.117 |
| Michigan     | Washington     | 0.119 |
| Connecticut  | Iowa           | 0.119 |
| Texas        | Wisconsin      | 0.121 |
| Michigan     | Utah           | 0.124 |
| New Jersey   | Utah           | 0.125 |
| Idaho        | Texas          | 0.129 |
| Louisiana    | Utah           | 0.129 |
| California   | Colorado       | 0.131 |
| Connecticut  | Idaho          | 0.133 |
| California   | Louisiana      | 0.133 |
| Iowa         | Maine          | 0.136 |
| Arizona      | Florida        | 0.138 |
| New York     | Wisconsin      | 0.141 |
| New York     | West Virginia  | 0.146 |
| Florida      | West Virginia  | 0.148 |
| Maine        | Utah           | 0.148 |
| Texas        | Utah           | 0.148 |
| Delaware     | Michigan       | 0.151 |
| Arizona      | Rhode Island   | 0.152 |
| Pennsylvania | Rhode Island   | 0.153 |
| Illinois     | Rhode Island   | 0.155 |
| California   | Pennsylvania   | 0.156 |
| Illinois     | New Jersey     | 0.157 |
| New Jersey   | Wisconsin      | 0.157 |
| California   | Iowa           | 0.161 |
| Kentucky     | Michigan       | 0.163 |
| California   | Maine          | 0.167 |
| Florida      | Pennsylvania   | 0.167 |
| Idaho        | Louisiana      | 0.171 |

|                |                |       |
|----------------|----------------|-------|
| Arizona        | Washington     | 0.172 |
| Colorado       | Nebraska       | 0.176 |
| Connecticut    | Utah           | 0.176 |
| Florida        | Maine          | 0.185 |
| Kentucky       | Texas          | 0.187 |
| Idaho          | Maine          | 0.188 |
| Michigan       | Pennsylvania   | 0.191 |
| Rhode Island   | Wisconsin      | 0.202 |
| Florida        | Hawaii         | 0.202 |
| Maine          | Michigan       | 0.204 |
| California     | Texas          | 0.204 |
| Colorado       | Delaware       | 0.207 |
| California     | Washington     | 0.211 |
| Arizona        | Colorado       | 0.213 |
| Florida        | New Jersey     | 0.214 |
| Iowa           | Louisiana      | 0.214 |
| Arizona        | Idaho          | 0.232 |
| West Virginia  | Wisconsin      | 0.237 |
| Nebraska       | Wisconsin      | 0.238 |
| Illinois       | Nebraska       | 0.245 |
| Idaho          | West Virginia  | 0.254 |
| Florida        | Wyoming        | 0.257 |
| North Carolina | Pennsylvania   | 0.268 |
| Arizona        | Utah           | 0.270 |
| Iowa           | Michigan       | 0.272 |
| Texas          | West Virginia  | 0.273 |
| Colorado       | Wyoming        | 0.274 |
| Illinois       | New York       | 0.276 |
| Florida        | Kentucky       | 0.279 |
| Delaware       | Maine          | 0.288 |
| Rhode Island   | Wyoming        | 0.289 |
| Arizona        | West Virginia  | 0.290 |
| Delaware       | Washington     | 0.293 |
| Arizona        | North Carolina | 0.301 |
| Washington     | West Virginia  | 0.301 |
| Nebraska       | New York       | 0.302 |
| Florida        | Louisiana      | 0.303 |
| Illinois       | West Virginia  | 0.304 |
| Wisconsin      | Wyoming        | 0.304 |
| California     | Idaho          | 0.308 |
| Kentucky       | Wisconsin      | 0.309 |
| Hawaii         | Louisiana      | 0.309 |
| Washington     | Wyoming        | 0.310 |
| Connecticut    | Wisconsin      | 0.311 |
| Nebraska       | Washington     | 0.313 |
| Delaware       | Rhode Island   | 0.322 |



|                |                |       |
|----------------|----------------|-------|
| Delaware       | Idaho          | 0.326 |
| Michigan       | New Jersey     | 0.333 |
| Connecticut    | West Virginia  | 0.340 |
| Maine          | Nebraska       | 0.341 |
| Arizona        | Iowa           | 0.349 |
| Kentucky       | West Virginia  | 0.353 |
| Idaho          | Nebraska       | 0.355 |
| Illinois       | Pennsylvania   | 0.358 |
| Delaware       | North Carolina | 0.366 |
| California     | Utah           | 0.369 |
| Utah           | Wyoming        | 0.369 |
| Colorado       | Hawaii         | 0.370 |
| Arizona        | Illinois       | 0.377 |
| New Jersey     | West Virginia  | 0.384 |
| Hawaii         | Idaho          | 0.385 |
| Idaho          | Wyoming        | 0.386 |
| Louisiana      | Michigan       | 0.390 |
| Kentucky       | Nebraska       | 0.396 |
| Connecticut    | Florida        | 0.397 |
| Louisiana      | Wisconsin      | 0.399 |
| Hawaii         | Iowa           | 0.407 |
| Florida        | Illinois       | 0.407 |
| Connecticut    | Michigan       | 0.416 |
| Delaware       | Wisconsin      | 0.417 |
| Nebraska       | Utah           | 0.418 |
| Delaware       | Iowa           | 0.427 |
| North Carolina | Wyoming        | 0.432 |
| Maine          | Wyoming        | 0.441 |
| Connecticut    | Illinois       | 0.442 |
| Connecticut    | North Carolina | 0.443 |
| Delaware       | Utah           | 0.452 |
| Illinois       | North Carolina | 0.455 |
| Hawaii         | West Virginia  | 0.459 |
| Kentucky       | North Carolina | 0.462 |
| Idaho          | Michigan       | 0.464 |
| Hawaii         | Washington     | 0.468 |
| Arizona        | Maine          | 0.469 |
| New York       | Texas          | 0.488 |
| Illinois       | Maine          | 0.492 |
| Illinois       | Wyoming        | 0.509 |
| Michigan       | Texas          | 0.514 |
| Maine          | New York       | 0.515 |
| Pennsylvania   | West Virginia  | 0.516 |
| Hawaii         | Utah           | 0.518 |
| Maine          | New Jersey     | 0.525 |
| Maine          | Texas          | 0.526 |

|                |                |       |
|----------------|----------------|-------|
| Pennsylvania   | Texas          | 0.537 |
| New Jersey     | New York       | 0.540 |
| Illinois       | Louisiana      | 0.548 |
| Illinois       | Kentucky       | 0.553 |
| Florida        | Wisconsin      | 0.554 |
| Nebraska       | Pennsylvania   | 0.555 |
| Louisiana      | Texas          | 0.555 |
| Iowa           | Wyoming        | 0.558 |
| Kentucky       | New Jersey     | 0.571 |
| Arizona        | New York       | 0.575 |
| Arizona        | Kentucky       | 0.576 |
| Illinois       | Wisconsin      | 0.576 |
| Maine          | Rhode Island   | 0.577 |
| Louisiana      | North Carolina | 0.584 |
| California     | Delaware       | 0.587 |
| Hawaii         | Illinois       | 0.609 |
| California     | Hawaii         | 0.611 |
| Hawaii         | Wisconsin      | 0.611 |
| Kentucky       | Wyoming        | 0.618 |
| New York       | Wyoming        | 0.620 |
| Connecticut    | Maine          | 0.623 |
| Hawaii         | North Carolina | 0.624 |
| Iowa           | Nebraska       | 0.628 |
| Nebraska       | New Jersey     | 0.632 |
| Arizona        | Michigan       | 0.646 |
| Connecticut    | Nebraska       | 0.651 |
| Colorado       | Idaho          | 0.653 |
| Nebraska       | Texas          | 0.656 |
| Maine          | Pennsylvania   | 0.656 |
| Arizona        | Pennsylvania   | 0.663 |
| Arizona        | California     | 0.670 |
| Florida        | North Carolina | 0.677 |
| Idaho          | Utah           | 0.682 |
| Arizona        | Louisiana      | 0.683 |
| Maine          | Wisconsin      | 0.701 |
| North Carolina | Wisconsin      | 0.708 |
| Arizona        | Connecticut    | 0.726 |
| Idaho          | Washington     | 0.729 |
| Kentucky       | Pennsylvania   | 0.735 |
| Louisiana      | Wyoming        | 0.735 |
| Louisiana      | Nebraska       | 0.736 |
| Pennsylvania   | Wyoming        | 0.737 |
| Connecticut    | Wyoming        | 0.752 |
| Hawaii         | Kentucky       | 0.752 |
| Delaware       | New York       | 0.758 |
| California     | Nebraska       | 0.763 |

|             |              |       |
|-------------|--------------|-------|
| Hawaii      | Michigan     | 0.767 |
| Delaware    | Kentucky     | 0.768 |
| Louisiana   | New Jersey   | 0.770 |
| Kentucky    | Maine        | 0.775 |
| New Jersey  | Texas        | 0.775 |
| Connecticut | Texas        | 0.794 |
| Connecticut | Kentucky     | 0.797 |
| Hawaii      | Maine        | 0.804 |
| New Jersey  | Pennsylvania | 0.819 |
| Michigan    | Wyoming      | 0.819 |
| Hawaii      | Nebraska     | 0.821 |
| Arizona     | New Jersey   | 0.822 |
| Kentucky    | New York     | 0.822 |
| Delaware    | Pennsylvania | 0.825 |
| Delaware    | Louisiana    | 0.826 |
| Idaho       | Iowa         | 0.828 |
| New Jersey  | Wyoming      | 0.830 |
| California  | Wyoming      | 0.832 |
| California  | Michigan     | 0.851 |
| Connecticut | Louisiana    | 0.853 |
| Connecticut | Delaware     | 0.862 |
| Connecticut | New York     | 0.865 |
| Delaware    | Nebraska     | 0.867 |
| Hawaii      | Texas        | 0.893 |
| Louisiana   | Pennsylvania | 0.895 |
| Arizona     | Nebraska     | 0.897 |
| Hawaii      | New York     | 0.900 |
| Michigan    | Nebraska     | 0.902 |
| Texas       | Wyoming      | 0.905 |
| New York    | Pennsylvania | 0.906 |
| Utah        | Washington   | 0.907 |
| Colorado    | Utah         | 0.911 |
| Hawaii      | Wyoming      | 0.911 |
| Delaware    | New Jersey   | 0.914 |
| Connecticut | New Jersey   | 0.915 |
| Iowa        | Utah         | 0.916 |
| Delaware    | Wyoming      | 0.928 |
| Louisiana   | New York     | 0.929 |
| Arizona     | Texas        | 0.936 |
| Arizona     | Hawaii       | 0.938 |
| Nebraska    | Wyoming      | 0.941 |
| Hawaii      | Pennsylvania | 0.945 |
| Kentucky    | Louisiana    | 0.945 |
| Arizona     | Wyoming      | 0.945 |
| Colorado    | Iowa         | 0.946 |
| Connecticut | Pennsylvania | 0.948 |

|             |                |       |
|-------------|----------------|-------|
| Iowa        | Washington     | 0.951 |
| Arizona     | Delaware       | 0.953 |
| Connecticut | Hawaii         | 0.955 |
| Delaware    | Hawaii         | 0.960 |
| Maine       | North Carolina | 0.967 |
| Colorado    | Washington     | 0.991 |
| Hawaii      | New Jersey     | 0.993 |
| Delaware    | Texas          | 0.994 |

\*Of 325 comparisons, differences were statistically significantly different for 71 ( $P < 0.05$ ) using a 2-sided test based on the permutation method to test for parallelism.

**Supplementary Table 4. Colorectal Cancer Incidence Rates among Adults Aged 20 to 49 years by Race/ethnicity and State, 2011 -2015**

| State                 | All races |                  | Non-Hispanic White |                   | Non-Hispanic Black |                    | Hispanic |                 | Asian/Pacific Islander |                  |
|-----------------------|-----------|------------------|--------------------|-------------------|--------------------|--------------------|----------|-----------------|------------------------|------------------|
|                       | N         | Rate (95% CI)    | N                  | Rate (95% CI)     | N                  | Rate (95% CI)      | N        | Rate (95% CI)   | N                      | Rate (95% CI)    |
| Alabama               | 1,265     | 13.9 (13.2-14.7) | 827                | 13.5 (12.6 -14.4) | 395                | 16.6 (15.0-18.3)   |          | *               |                        | *                |
| Alaska                | 163       | 11.6 (9.9-13.6)  | 83                 | 8.7 (6.9 -10.8)   |                    | *                  |          | *               |                        | *                |
| Arizona               | 1,142     | 9.5 (8.9-10.0)   | 679                | 10.0 (9.3 -10.8)  | 57                 | 10.2 (7.7 -13.2)   | 295      | 8.0 (7.1-9.0)   | 33                     | 5.8 (4.0-8.1)    |
| Arkansas              | 721       | 13.5 (12.5-14.5) | 534                | 13.3 (12.2-14.5)  | 134                | 16.5 (13.8-19.5)   | 33       | 8.7 (6.0-12.3)  |                        | *                |
| California            | 7,566     | 10.0 (9.8-10.2)  | 3252               | 11.1 (10.7-11.5)  | 529                | 11.2 (10.2-12.2)   | 2441     | 8.4 (8.1-8.7)   | 1217                   | 9.5 (9.0-10.1)   |
| Colorado              | 971       | 9.4 (8.8-10.0)   | 679                | 9.3 (8.6-10.0)    | 56                 | 12.3 (9.3 -16.0)   | 191      | 9.1 (7.8-10.4)  | 32                     | 7.5 (5.1-10.6)   |
| Connecticut           | 799       | 11.3 (10.5-12.1) | 551                | 11.3 (10.4-12.3)  | 91                 | 12.1 (9.7 -14.8)   | 109      | 10.1 (8.3-12.2) |                        | *                |
| Delaware              | 202       | 11.5 (9.9-13.2)  | 124                | 11.1 (9.2-13.2)   | 66                 | 16.2 (12.5 - 20.6) |          | *               |                        | *                |
| District of Columbia† | 132       | 12.7 (10.6-15.1) | 37                 | 8.2 (5.6-11.5)    | 74                 | 16.0 (12.5- 20.1)  |          | *               |                        | *                |
| Florida               | 4,154     | 11.2 (10.9-11.6) | 2319               | 11.9 (11.4-12.4)  | 738                | 12.5 (11.6-13.4)   | 917      | 9.1 (8.5-9.7)   | 122                    | 9.0 (7.5-10.8)   |
| Georgia               | 2,527     | 12.5 (12.0-13.0) | 1417               | 12.8 (12.1-13.5)  | 882                | 13.9 (13.0-14.8)   | 137      | 7.6 (6.4-9.0)   | 79                     | 8.4 (6.6-10.4)   |
| Hawaii                | 358       | 13.8 (12.4-15.3) | 71                 | 12.6 (9.8-15.9)   |                    | *                  |          | *               | 259                    | 13.8 (12.2-15.6) |
| Idaho                 | 282       | 9.9 (8.8-11.2)   | 252                | 10.5 (9.3-11.9)   |                    | *                  |          |                 |                        | *                |
| Illinois              | 2,660     | 10.7 (10.3-11.1) | 1701               | 10.9 (10.4-11.4)  | 476                | 13.5 (12.3-14.8)   | 308      | 7.2 (6.4-8.1)   | 137                    | 8.9 (7.4-10.5)   |
| Indiana               | 1,458     | 11.8 (11.2-12.5) | 1236               | 12.2 (11.5-12.9)  | 131                | 11.5 (9.6-13.6)    | 63       | 8.1 (6.2-10.3)  |                        | *                |
| Iowa                  | 676       | 12.4 (11.4-13.3) | 622                | 12.9 (11.9-13.9)  |                    | *                  |          | *               |                        | *                |
| Kentucky              | 1,184     | 14.1 (13.3-14.9) | 1042               | 14.3 (13.4, 15.2) | 95                 | 14.3 (11.6-17.5)   |          | *               |                        | *                |
| Louisiana             | 1,173     | 13.8 (13.0-14.6) | 709                | 13.6 (12.6-14.7)  | 410                | 15.5 (14.1-17.1)   | 35       | 8.2 (5.7-11.4)  |                        | *                |
| Maine                 | 250       | 10.0 (8.8-11.4)  | 236                | 9.9 (8.6-11.2)    |                    | *                  |          | *               |                        | *                |
| Massachusetts         | 1,501     | 11.4 (10.8-12.0) | 1150               | 11.6 (11.0 -12.3) | 126                | 13.3 (11.1-15.9)   | 122      | 8.9 (7.4-10.7)  | 78                     | 8.3 (6.5-10.3)   |
| Michigan              | 2,057     | 11.0 (10.5-11.5) | 1548               | 10.8 (10.3-11.3)  | 363                | 13.6 (12.2 -15.0)  | 62       | 7.6 (5.8-9.8)   | 51                     | 7.8 (5.8-10.3)   |
| Mississippi           | 780       | 14.2 (13.2-15.2) | 428                | 13.4 (12.1-14.7)  | 329                | 16.1 (14.4 -18.0)  |          | *               |                        | *                |
| Missouri              | 1,249     | 11.3 (10.6-11.9) | 1050               | 11.6 (10.9 -12.4) | 144                | 11.0 (9.3- 13.0)   | 27       | 6.1 (4.0-8.9)   |                        | *                |
| Montana               | 181       | 10.4 (8.9-12.0)  | 160                | 10.3 (8.8-12.0)   |                    | *                  |          | *               |                        | *                |
| Nebraska              | 398       | 12.0 (10.8-13.2) | 333                | 12.2 (10.9-13.6)  | 25                 | 15.6 (10.1-22.9)   | 26       | 7.6 (4.9-11.1)  |                        | *                |
| Nevada‡               | 553       | 10.1 (9.2-10.9)  | 337                | 10.5 (9.4-11.7)   | 58                 | 12.8 (9.7-16.6)    | 101      | 7.8 (6.4-9.5)   | 43                     | 8.5 (6.2-11.5)   |
| New Hampshire         | 298       | 11.5 (10.2-12.9) | 285                | 11.9 (10.6-13.4)  |                    | *                  |          | *               |                        | *                |
| New Jersey            | 1,981     | 10.9 (10.5-11.4) | 1173               | 11.7 (11.1-12.4)  | 320                | 13.0 (11.6-14.5)   | 300      | 8.2 (7.3-9.2)   | 150                    | 7.5 (6.4 -8.8)   |
| New Mexico§           | 181       | 11.7 (10.1-13.6) | 74                 | 12.1 (9.5-15.3)   |                    | *                  | 80       | 11.1 (8.8-13.8) |                        | *                |
| New York              | 4,390     | 11.4 (11.0-11.7) | 2496               | 11.6 (11.2-12.1)  | 759                | 12.7 (11.8-13.7)   | 679      | 9.2 (8.5-9.9)   | 398                    | 10.6 (9.6-11.7)  |
| North Carolina        | 2,288     | 11.8 (11.4-12.3) | 1499               | 12.0 (11.4-12.6)  | 555                | 13.1 (12.0 -14.2)  | 121      | 7.2 (6.0-8.6)   | 46                     | 7.4 (5.4-9.9)    |

|                |        |                  |        |                  |       |                   |       |                 |       |                |
|----------------|--------|------------------|--------|------------------|-------|-------------------|-------|-----------------|-------|----------------|
| North Dakota   | 150    | 12.4 (10.5-14.6) | 136    | 12.7 (10.7-15.1) | *     | *                 | *     |                 |       |                |
| Ohio           | 2,544  | 11.7 (11.3-12.2) | 2061   | 11.6 (11.1-12.1) | 327   | 12.3 (11.0-13.7)  | 49    | 6.9 (5.1-9.2)   | 36    | 6.6 (4.6-9.1)  |
| Oklahoma       | 920    | 13.4 (12.6-14.3) | 627    | 12.9 (11.9-13.9) | 77    | 14.1 (11.1-17.6)  | 61    | 9.8 (7.5-12.7)  |       |                |
| Oregon         | 744    | 10.1 (9.4-10.8)  | 588    | 10.2 (9.4-11.1)  | *     |                   | 83    | 9.2 (7.3-11.5)  | 36    | 8.3 (5.8-11.4) |
| Pennsylvania   | 2,854  | 12.0 (11.5-12.4) | 2229   | 11.9 (11.4-12.4) | 382   | 14.4 (13.0-15.9)  | 129   | 8.6 (7.2-10.2)  | 59    | 6.3 (4.8- 8.1) |
| Rhode Island   | 201    | 9.9 (8.6-11.4)   | 148    | 9.6 (8.1-11.3)   |       |                   | 27    | 10.1 (6.6-14.6) |       | *              |
| South Carolina | 1,124  | 12.5 (11.8-13.3) | 719    | 12.4 (11.5-13.4) | 344   | 13.8 (12.4 -15.4) | 42    | 9.0 (6.5-12.2)  |       | *              |
| South Dakota   | 157    | 11.1 (9.4-12.9)  | 132    | 10.8 (9.1-12.9)  | *     |                   | *     |                 |       | *              |
| Tennessee      | 1,613  | 12.9 (12.3-13.6) | 1243   | 13.1 (12.4-13.9) | 303   | 14.5 (12.9 -16.2) | 33    | 5.9 (4.0 – 8.3) | 25    | 8.9 (5.8-13.2) |
| Texas          | 5,585  | 10.9 (10.6-11.2) | 2785   | 12.3 (11.9-12.8) | 801   | 12.6 (11.8 -13.5) | 1769  | 9.2 (8.7-9.6)   | 204   | 7.1 (6.1-8.1)  |
| Utah           | 526    | 10.4 (9.5-11.3)  | 420    | 10.3 (9.4-11.4)  | *     |                   | 68    | 9.8 (7.6-12.4)  |       | *              |
| Vermont        | 121    | 10.5 (8.7-12.5)  | 118    | 10.7 (8.8-12.8)  | *     |                   | *     |                 |       | *              |
| Virginia       | 1,696  | 10.3 (9.8-10.8)  | 1110   | 10.6 (10.0-11.3) | 383   | 11.9 (10.8-13.2)  | 79    | 5.1 (4.0 -6.3)  | 86    | 6.7 (5.4-8.3)  |
| Washington     | 1,375  | 10.2 (9.7-10.8)  | 1023   | 10.5 (9.8-11.1)  | 71    | 12.0 (9.3-15.1)   | 112   | 7.5 (6.2-9.1)   | 107   | 7.4 (6.1-8.9)  |
| West Virginia  | 475    | 13.9 (12.7-15.2) | 455    | 14.2 (12.9-15.5) | *     |                   | *     |                 |       | *              |
| Wisconsin      | 1,140  | 10.5 (9.9-11.1)  | 927    | 10.1 (9.5-10.8)  | 108   | 16.1 (13.2-19.5)  | 51    | 8.1 (6.0-10.7)  |       | *              |
| Wyoming        | 92     | 9.1 (7.3-11.2)   | 83     | 9.5 (7.5-11.8)   | *     |                   | *     |                 |       | *              |
| US             | 63,991 | 11.3 (11.2-11.3) | 41,260 | 11.7 (11.5-11.8) | 9,579 | 13.2 (13.0-13.5)  | 8,521 | 8.5 (8.3-8.7)   | 3,372 | 8.8 (8.5-9.1)  |

\* < 25 cases. CI = confidence interval.

†Rates based on diagnosis years 2011-2014.

‡Rates based on diagnosis years 2006-2010.

§Rates based on diagnosis years 2011-2012.

**Supplementary Table 5. Trend in colorectal cancer incidence rates among adults 20-49 years by state and subsite, non-Hispanic black**

| State                 | Available years | Number of cases | AAPC 2006-2015 (95% CI) |                    |                  |
|-----------------------|-----------------|-----------------|-------------------------|--------------------|------------------|
|                       |                 |                 | CRC                     | Colon              | Rectum           |
| Alabama               | 1998 -2015      | 1,273           | 1.2* (0.2, 2.2)         | 0.1 (-0.9, 1.1)    | 3.9* (2.0, 5.8)  |
| Alaska                | 1996 - 2015     |                 | †                       |                    |                  |
| Arizona               | 1995 - 2015     | 201             | †                       | †                  | †                |
| Arkansas              | 2001-2015       | 388             | 1.5 (-1.0, 4.1)         | 0.7 (-2.2, 3.6)    | †                |
| California            | 1995 - 2015     | 2,347           | 0.4 (-0.5, 1.3)         | 0.6 (-0.5, 1.8)    | 0.0 (-1.3, 1.3)  |
| Colorado              | 1995 - 2015     | 189             | †                       | †                  | †                |
| Connecticut           | 1995 - 2015     | 346             | -0.8 (-2.9, 1.4)        | †                  | †                |
| Delaware              | 1995 - 2015     | 200             | †                       | †                  | †                |
| District of Columbia† | 1997 -2014      | 322             | 1.5 (-0.5, 3.5)         | †                  | †                |
| Florida               | 1995 - 2015     | 2,943           | -0.8* (-1.5, -0.2)      | -0.9* (-1.7, -0.2) | -0.5 (-1.6, 0.6) |
| Georgia               | 1997 - 2015     | 3,024           | 0.4 (-0.4, 1.1)         | -0.1 (-1.0, 0.9)   | 1.4 (-0.3, 3.1)  |
| Hawaii                | 1995 - 2015     | 29              | †                       | †                  | †                |
| Idaho                 | 1995 - 2015     |                 | †                       |                    |                  |
| Illinois              | 1995 - 2015     | 2,048           | 0.3 (-0.4, 1.1)         | -0.1 (-0.9, 0.7)   | 1.4 (-0.2, 3.1)  |
| Indiana               | 1998 - 2015     | 508             | -1.2 (-2.6, 0.3)        | -1.9 (-3.9, 0.1)   | 0.3 (-2.0, 2.7)  |
| Iowa                  | 1995 - 2015     | 76              | †                       | †                  | †                |
| Kentucky              | 1995 - 2015     | 392             | -1.2 (-3.2, 0.9)        | †                  | †                |
| Louisiana             | 1995 - 2015     | 1,643           | 0.9 (-0.0, 1.8)         | 0.1 (-0.9, 1.1)    | 2.5* (1.0, 4.0)  |
| Maine                 | 1995 - 2015     |                 | †                       |                    |                  |
| Massachusetts         | 1997- 2015      | 403             | 1.2 (-0.7, 3.1)         | -0.2 (-2.8, 2.5)   | †                |
| Michigan              | 1995 - 2015     | 1,512           | 0.9 (-0.4, 2.2)         | 1.4* (0.1, 2.7)    | 0.1 (-1.9, 2.0)  |
| Mississippi           | 2004 - 2015     | 819             | -1.8 (-4.5, 0.9)        | -1.0 (-4.5, 2.6)   | -3.4 (-7.0, 0.3) |
| Missouri              | 1998 - 2015     | 627             | -0.8 (-2.6, 1.1)        | -2.0 (-4.1, 0.1)   | †                |
| Montana               | 1996 - 2015     |                 | †                       |                    |                  |
| Nebraska              | 1995 - 2015     | 67              | †                       | †                  | †                |
| Nevada§               | 1997- 2010      | 118             | †                       | †                  | †                |
| New Hampshire         | 1999 - 2015     |                 | †                       |                    |                  |
| New Jersey            | 1995 - 2015     | 1,289           | 0.4 (-0.6, 1.3)         | -0.1 (-1.3, 1.0)   | 1.0 (-0.2, 2.2)  |
| New Mexico¶           | 1995 - 2012     |                 | †                       |                    |                  |
| New York              | 1995 - 2015     | 3,007           | 1.5* (0.7, 2.3)         | 0.5 (-0.8, 1.7)    | 3.4* (2.6, 4.2)  |
| North Carolina        | 1995 - 2015     | 2,286           | -2.8* (-5.3, -0.2)      | -2.6* (-5.0, -0.2) | -1.9 (-6.3, 2.6) |

|                |             |        |                    |                    |                  |
|----------------|-------------|--------|--------------------|--------------------|------------------|
| North Dakota   | 1998 - 2015 |        | †                  |                    |                  |
| Ohio           | 1997 - 2015 | 1,267  | 0.7 (-0.4, 1.9)    | 0.4 (-1.0, 1.8)    | 1.6 (-0.3, 3.6)  |
| Oklahoma       | 1997 - 2015 | 290    | 0.4 (-1.6, 2.5)    | -0.1 (-2.0, 2.0)   | †                |
| Oregon         | 1996 - 2015 | 62     | †                  | †                  | †                |
| Pennsylvania   | 1995 - 2015 | 1,424  | 1.2* (0.3, 2.1)    | -2.9 (-8.3, 2.7)   | 1.8* (0.0, 3.7)  |
| Rhode Island   | 1995 - 2015 | 45     | †                  | †                  | †                |
| South Carolina | 1997 - 2015 | 1,439  | 0.9 (-3.5, 5.5)    | 0.7 (-3.0, 4.5)    | -0.7 (-2.6, 1.4) |
| South Dakota   | 2001 - 2015 |        | †                  |                    |                  |
| Tennessee      | 2004 - 2015 | 736    | -1.1 (-3.5, 1.3)   | -1.4 (-4.6, 2.0)   | -0.3 (-3.8, 3.3) |
| Texas          | 1995 - 2015 | 3,121  | -0.6 (-1.2, 0.0)   | -0.5 (-1.3, 0.3)   | -0.7 (-1.6, 0.1) |
| Utah           | 1995 - 2015 |        | †                  |                    |                  |
| Vermont        | 1996 - 2015 |        | †                  |                    |                  |
| Virginia#      | 1998 - 2015 | 1,381  | -0.9* (-1.8, -0.0) | -1.2 (-2.4, 0.1)   | -0.7 (-2.7, 1.3) |
| Washington     | 1995 - 2015 | 244    | 1.0 (-1.0, 3.0)    | †                  | †                |
| West Virginia  | 1995 - 2015 | 79     | †                  | †                  | †                |
| Wisconsin      | 1995 - 2015 | 404    | 0.0 (-1.6, 1.8)    | †                  | †                |
| Wyoming        | 1995 - 2015 |        | †                  |                    |                  |
| US             | 1995 - 2015 | 36,660 | -0.4 (-1.2, 0.3)   | -0.3* (-0.6, -0.1) | 1.1* (0.6, 1.6)  |

\*Indicates AAPC is statistically significantly different from zero ( $P < 0.05$ ) using a 2-sided test based on the permutation method. AAPC = Average Annual Percent Change; CI = confidence interval.

† <6 cases in 1 or more years.

‡ Data unavailable for 2002; AAPC reflects data during 2005-2014.

§AAPC during 2001-2010.

¶AAPC during 2003-2012.

#Data unavailable for 2001.



**Supplementary Table 6. Trend in colorectal cancer incidence rates among adults 20-49 years by state and subsite, Hispanic**

| State                             | Available years | Number of cases | AAPC 2006-2015 (95% CI)        |                                |                             |
|-----------------------------------|-----------------|-----------------|--------------------------------|--------------------------------|-----------------------------|
|                                   |                 |                 | CRC                            | Colon                          | Rectum                      |
| Alabama                           | 1998 -2015      | 54              | *                              | *                              | *                           |
| Alaska                            | 1996 - 2015     |                 |                                | *                              |                             |
| Arizona                           | 1995 - 2015     | 969             | -2.3 (-5.8, 1.3)               | -4.1 (-9.6, 1.7)               | *                           |
| Arkansas                          | 2001 - 2015     | 67              | *                              | *                              | *                           |
| California                        | 1995 - 2015     | 7,399           | 2.0 <sup>†</sup> (1.7, 2.3)    | 1.8 <sup>†</sup> (1.4, 2.3)    | 2.3 <sup>†</sup> (1.6, 3.0) |
| Colorado                          | 1995 - 2015     | 588             | 0.2 (-1.1, 1.5)                | -0.8 (-2.3, 0.7)               | *                           |
| Connecticut                       | 1995 - 2015     | 337             | 0.1 (-1.6, 1.9)                | *                              | *                           |
| Delaware                          | 1995 - 2015     | 27              | *                              | *                              | *                           |
| District of Columbia <sup>‡</sup> | 1997 -2014      | 33              | *                              | *                              | *                           |
| Florida                           | 1995 - 2015     | 3,012           | -0.8 <sup>†</sup> (-1.6, -0.1) | -1.2 <sup>†</sup> (-2.2, -0.3) | -0.2 (-1.3, 0.9)            |
| Georgia                           | 1997 - 2015     | 319             | 1.9 (-1.7, 5.7)                | *                              | *                           |
| Hawaii                            | 1995 - 2015     | 73              | *                              | *                              | *                           |
| Idaho                             | 1995 - 2015     | 60              | *                              | *                              | *                           |
| Illinois                          | 1995 - 2015     | 996             | 1.3 (-0.1, 2.8)                | 0.5 (-1.4, 2.4)                | -2.3 (-6.8, 2.5)            |
| Indiana                           | 1998 - 2015     | 161             | *                              | *                              | *                           |
| Iowa                              | 1995 - 2015     | 50              | *                              | *                              | *                           |
| Kentucky                          | 1995 - 2015     | 52              | *                              | *                              | *                           |
| Louisiana                         | 1995 - 2015     | 86              | *                              | *                              | *                           |
| Maine                             | 1995 - 2015     |                 |                                | *                              |                             |
| Massachusetts                     | 1997- 2015      | 354             | 0.1 (-2.1, 2.3)                | *                              | *                           |
| Michigan                          | 1995 - 2015     | 226             | *                              | *                              | *                           |
| Mississippi                       | 2004 - 2015     |                 |                                | *                              |                             |
| Missouri                          | 1998 - 2015     | 83              | *                              | *                              | *                           |
| Montana                           | 1996 - 2015     |                 |                                | *                              |                             |
| Nebraska                          | 1995 - 2015     | 73              | *                              | *                              | *                           |
| Nevada <sup>§</sup>               | 1997- 2010      | 188             | *                              | *                              | *                           |
| New Hampshire                     | 1999 - 2015     |                 |                                | *                              |                             |
| New Jersey                        | 1995 - 2015     | 1,109           | -0.5 (-1.6, 0.7)               | -0.7 (-1.8, 0.4)               | -0.3 (-2.6, 2.1)            |
| New Mexico <sup>¶</sup>           | 1995 - 2012     | 489             | 2.9 <sup>†</sup> (0.7, 5.1)    | 2.9 <sup>†</sup> (0.1, 5.8)    | *                           |
| New York                          | 1995 - 2015     | 2,459           | 0.9 <sup>†</sup> (0.1, 1.8)    | 0.7 (-0.4, 1.8)                | 1.2 <sup>†</sup> (0.1, 2.3) |
| North Carolina                    | 1995 - 2015     | 292             | *                              | *                              | *                           |

|                |             |        |                  |                  |                             |   |
|----------------|-------------|--------|------------------|------------------|-----------------------------|---|
| North Dakota   | 1998 - 2015 |        | *                | *                |                             |   |
| Ohio           | 1997 - 2015 | 142    | *                | *                | *                           | * |
| Oklahoma       | 1997 - 2015 | 167    | *                | *                | *                           | * |
| Oregon         | 1996 - 2015 | 205    | *                | *                | *                           | * |
| Pennsylvania   | 1995 - 2015 | 412    | *                | *                | *                           | * |
| Rhode Island   | 1995 - 2015 | 74     | *                | *                | *                           | * |
| South Carolina | 1997 - 2015 | 87     | *                | *                | *                           | * |
| South Dakota   | 2001 - 2015 |        |                  | *                |                             |   |
| Tennessee      | 2004 - 2015 | 71     | *                | *                | *                           | * |
| Texas          | 1995 - 2015 | 5,654  | 0.0 (-0.5, 0.6)  | -0.1(-0.8, 0.6)  | 0.2 (-0.5, 0.9)             |   |
| Utah           | 1995 - 2015 | 185    | *                | *                | *                           | * |
| Vermont        | 1996 -2015  |        |                  | *                |                             |   |
| Virginia#      | 1998 - 2015 | 216    | -1.9 (-4.5, 0.8) | *                | *                           | * |
| Washington     | 1995 - 2015 | 292    | *                | *                | *                           | * |
| West Virginia  | 1995 - 2015 |        |                  | *                |                             |   |
| Wisconsin      | 1995 - 2015 | 140    | *                | *                | *                           | * |
| Wyoming        | 1995 - 2015 |        |                  | *                |                             |   |
| US             | 1995 - 2015 | 27,313 | 0.1 (-0.4, 0.6)  | -0.3 (-0.8, 0.3) | 1.2 <sup>†</sup> (0.7, 1.6) |   |

\*<6 cases in 1 or more years. AAPC = Average Annual Percent Change; CI = confidence interval.

<sup>†</sup>Indicates AAPC is statistically significantly different from zero (P < 0.05) using a 2-sided test based on the permutation method.

<sup>‡</sup>Data unavailable for 2002; AAPC reflects data during 2005-2014.

<sup>§</sup>AAPC during 2001-2010.

<sup>¶</sup>AAPC during 2003-2012.

<sup>#</sup>Data unavailable for 2001.

**Supplementary Table 7. Obesity Prevalence among Adults aged 20-49 years by State, Behavioral Risk Factor Surveillance System 1995, 2000, 2005, and 2010\*.**

| State                | 1995 (n=65,550) |           |      | 2000 (n=98,562) |      |           | 2005 (n=149,713) |           |      | 2010 (n=132,467) |                     |           | 2010 vs 1995     |        |      |                     |    |                   | 2005 vs 1995 |  |  |  |
|----------------------|-----------------|-----------|------|-----------------|------|-----------|------------------|-----------|------|------------------|---------------------|-----------|------------------|--------|------|---------------------|----|-------------------|--------------|--|--|--|
|                      |                 |           |      |                 |      |           |                  |           |      |                  | Absolute difference |           | Prevalence ratio |        |      | Absolute difference |    | Prevalence ratios |              |  |  |  |
|                      | %               | 95%CI     | %    | 95%CI           | %    | 95%CI     | %                | 95%CI     | %    | 95%CI            | %                   | P-value†  | PR               | 95%CI  | %    | P-value†            | PR | 95%CI             |              |  |  |  |
| Total                | 14.9            | 14.4 15.3 | 19.8 | 19.4 20.3       | 24.0 | 23.6 24.5 | 28.0             | 27.6 28.5 | 13.1 | <0.001           | 1.88                | 1.82 1.95 | 9.2              | <0.001 | 1.62 | 1.56 1.67           |    |                   |              |  |  |  |
| Alabama              | 17.3            | 14.9 20.1 | 24.4 | 21.6 27.5       | 30.4 | 27.4 33.7 | 33.2             | 30.5 36.0 | 15.9 | <0.001           | 1.92                | 1.61 2.27 | 13.1             | <0.001 | 1.76 | 1.46 2.11           |    |                   |              |  |  |  |
| Alaska               | 18.5            | 15.4 22.2 | 19.1 | 16.4 22.1       | 26.1 | 23.1 29.4 | 23.7             | 19.7 28.3 | 5.2  | 0.03             | 1.28                | 0.99 1.66 | 7.6              | 0.001  | 1.41 | 1.13 1.76           |    |                   |              |  |  |  |
| Arizona              | 14.5            | 11.6 18.0 | 19.3 | 16.1 23.1       | 20.8 | 17.5 24.5 | 25.5             | 22.2 29.1 | 11.0 | <0.001           | 1.76                | 1.36 2.28 | 6.3              | 0.01   | 1.43 | 1.08 1.89           |    |                   |              |  |  |  |
| Arkansas             | 16.1            | 13.5 19.0 | 24.6 | 22.1 27.3       | 29.9 | 27.6 32.3 | 33.8             | 29.9 37.9 | 17.8 | <0.001           | 2.11                | 1.71 2.59 | 13.9             | <0.001 | 1.86 | 1.55 2.24           |    |                   |              |  |  |  |
| California           | 14.6            | 12.7 16.8 | 20.3 | 18.3 22.4       | 22.4 | 20.5 24.3 | 24.9             | 23.6 26.3 | 10.3 | <0.001           | 1.70                | 1.46 1.98 | 7.7              | <0.001 | 1.53 | 1.3 1.8             |    |                   |              |  |  |  |
| Colorado             | 9.2             | 7.5 11.1  | 13.2 | 11.1 15.5       | 17.6 | 16.0 19.3 | 22.2             | 20.4 24.2 | 13.1 | <0.001           | 2.43                | 1.97 3.01 | 8.5              | <0.001 | 1.93 | 1.55 2.39           |    |                   |              |  |  |  |
| Connecticut          | 11.8            | 9.8 14.1  | 15.7 | 14.0 17.5       | 19.8 | 17.8 22.0 | 22.6             | 20.2 25.2 | 10.8 | <0.001           | 1.92                | 1.55 2.37 | 8.0              | <0.001 | 1.68 | 1.36 2.07           |    |                   |              |  |  |  |
| Delaware             | 14.9            | 12.8 17.3 | 15.2 | 13.1 17.6       | 24.0 | 21.5 26.7 | 27.6             | 24.5 31.0 | 12.7 | <0.001           | 1.85                | 1.53 2.24 | 9.1              | <0.001 | 1.61 | 1.34 1.93           |    |                   |              |  |  |  |
| District of Columbia |                 | ‡         | 20.2 | 17.5 23.1       | 19.8 | 17.4 22.5 | 21.6             | 19.1 24.5 |      | ‡                |                     | ‡         |                  | ‡      |      | ‡                   |    |                   |              |  |  |  |
| Florida              | 17.5            | 15.5 19.8 | 18.7 | 17.0 20.6       | 21.9 | 19.9 24.1 | 28.9             | 26.9 30.9 | 11.3 | <0.001           | 1.65                | 1.43 1.90 | 4.4              | 0.004  | 1.25 | 1.07 1.46           |    |                   |              |  |  |  |
| Georgia              | 12.7            | 11.0 14.7 | 21.5 | 19.5 23.7       | 26.2 | 24.1 28.6 | 31.4             | 28.8 34.2 | 18.7 | <0.001           | 2.47                | 2.08 2.93 | 13.5             | <0.001 | 2.06 | 1.74 2.45           |    |                   |              |  |  |  |
| Hawaii               | 11.7            | 9.8 13.8  | 16.1 | 14.5 17.9       | 21.3 | 19.2 23.4 | 26.1             | 23.5 28.9 | 14.4 | <0.001           | 2.23                | 1.83 2.73 | 9.6              | <0.001 | 1.82 | 1.49 2.21           |    |                   |              |  |  |  |
| Idaho                | 13.8            | 12.0 15.8 | 17.8 | 16.2 19.5       | 23.2 | 21.2 25.4 | 27.4             | 24.8 30.1 | 13.5 | <0.001           | 1.98                | 1.67 2.34 | 9.4              | <0.001 | 1.68 | 1.43 1.98           |    |                   |              |  |  |  |
| Illinois             | 15.3            | 13.5 17.3 | 19.8 | 17.9 21.8       | 23.8 | 21.8 26.0 | 28.5             | 25.7 31.5 | 13.2 | <0.001           | 1.86                | 1.59 2.18 | 8.5              | <0.001 | 1.55 | 1.33 1.81           |    |                   |              |  |  |  |
| Indiana              | 18.7            | 16.7 20.9 | 19.9 | 17.8 22.1       | 26.4 | 24.5 28.4 | 29.4             | 27.2 31.7 | 10.7 | <0.001           | 1.57                | 1.37 1.80 | 7.7              | <0.001 | 1.41 | 1.23 1.62           |    |                   |              |  |  |  |
| Iowa                 | 16.7            | 15.0 18.6 | 19.8 | 17.7 22.0       | 23.7 | 21.6 25.9 | 28.3             | 25.7 31.1 | 11.6 | <0.001           | 1.69                | 1.47 1.96 | 6.9              | <0.001 | 1.42 | 1.23 1.63           |    |                   |              |  |  |  |
| Kansas               | 16.0            | 13.8 18.4 | 20.0 | 18.2 21.9       | 24.1 | 22.5 25.7 | 30.8             | 28.6 33.1 | 14.9 | <0.001           | 1.93                | 1.64 2.27 | 8.1              | <0.001 | 1.51 | 1.28 1.77           |    |                   |              |  |  |  |
| Kentucky             | 16.3            | 14.2 18.8 | 24.2 | 22.2 26.4       | 28.0 | 25.7 30.4 | 31.8             | 28.9 34.8 | 15.5 | <0.001           | 1.95                | 1.64 2.30 | 11.6             | <0.001 | 1.71 | 1.45 2.02           |    |                   |              |  |  |  |
| Louisiana            | 15.9            | 13.7 18.5 | 22.7 | 20.9 24.6       | 30.6 | 27.8 33.5 | 31.4             | 29.0 34.0 | 15.5 | <0.001           | 1.97                | 1.67 2.33 | 14.6             | <0.001 | 1.92 | 1.61 2.28           |    |                   |              |  |  |  |
| Maine                | 13.2            | 10.6 16.3 | 20.2 | 17.6 23.1       | 24.3 | 22.1 26.8 | 28.2             | 26.1 30.5 | 15.1 | <0.001           | 2.14                | 1.71 2.70 | 11.2             | <0.001 | 1.85 | 1.46 2.34           |    |                   |              |  |  |  |
| Maryland             | 16.0            | 14.6 17.5 | 19.4 | 17.6 21.3       | 23.3 | 21.6 25.0 | 28.9             | 26.7 31.2 | 13.0 | <0.001           | 1.81                | 1.61 2.04 | 7.3              | <0.001 | 1.46 | 1.3 1.64            |    |                   |              |  |  |  |
| Massachusetts        | 9.3             | 7.5 11.4  | 14.8 | 13.6 16.1       | 20.7 | 19.0 22.5 | 23.6             | 22.0 25.3 | 14.4 | <0.001           | 2.55                | 2.05 3.17 | 11.4             | <0.001 | 2.23 | 1.79 2.79           |    |                   |              |  |  |  |
| Michigan             | 16.5            | 14.5 18.7 | 19.8 | 17.6 22.2       | 25.4 | 24.0 26.8 | 32.2             | 29.9 34.7 | 15.8 | <0.001           | 1.95                | 1.69 2.26 | 8.9              | <0.001 | 1.54 | 1.34 1.76           |    |                   |              |  |  |  |
| Minnesota            | 15.3            | 13.8 17.0 | 16.0 | 14.1 18.1       | 22.6 | 19.9 25.4 | 24.4             | 21.7 27.3 | 9.1  | <0.001           | 1.59                | 1.37 1.86 | 7.3              | <0.001 | 1.47 | 1.26 1.73           |    |                   |              |  |  |  |
| Mississippi          | 19.2            | 16.5 22.3 | 25.4 | 22.7 28.3       | 32.3 | 29.8 34.9 | 35.8             | 33.2 38.4 | 16.5 | <0.001           | 1.86                | 1.57 2.20 | 13.1             | <0.001 | 1.68 | 1.42 1.99           |    |                   |              |  |  |  |
| Missouri             | 19.2            | 16.4 22.4 | 20.8 | 18.6 23.2       | 27.5 | 24.9 30.2 | 32.3             | 28.9 35.8 | 13.1 | <0.001           | 1.68                | 1.39 2.03 | 8.3              | <0.001 | 1.43 | 1.19 1.72           |    |                   |              |  |  |  |
| Montana              | 13.8            | 11.2 16.8 | 15.6 | 13.5 18.1       | 19.0 | 16.9 21.4 | 22.7             | 20.2 25.5 | 9.0  | <0.001           | 1.65                | 1.31 2.08 | 5.3              | 0.004  | 1.38 | 1.1 1.74            |    |                   |              |  |  |  |
| Nebraska             | 15.7            | 13.4 18.3 | 20.7 | 18.4 23.1       | 25.2 | 23.3 27.2 | 27.5             | 25.1 30.0 | 11.8 | <0.001           | 1.75                | 1.46 2.09 | 9.5              | <0.001 | 1.61 | 1.35 1.91           |    |                   |              |  |  |  |
| Nevada               | 12.6            | 10.4 15.3 | 17.7 | 14.7 21.1       | 22.2 | 19.1 25.6 | 22.3             | 18.9 26.0 | 9.7  | <0.001           | 1.77                | 1.37 2.27 | 9.6              | <0.001 | 1.76 | 1.38 2.24           |    |                   |              |  |  |  |

|                |      |      |      |      |      |      |      |      |      |      |      |      |      |        |      |      |      |      |        |      |      |      |
|----------------|------|------|------|------|------|------|------|------|------|------|------|------|------|--------|------|------|------|------|--------|------|------|------|
| New Hampshire  | 13.9 | 11.5 | 16.6 | 16.6 | 14.0 | 19.5 | 22.0 | 20.2 | 24.0 | 26.2 | 23.7 | 28.8 | 12.3 | <0.001 | 1.89 | 1.53 | 2.32 | 8.1  | <0.001 | 1.59 | 1.29 | 1.94 |
| New Jersey     | 12.1 | 9.5  | 15.3 | 16.7 | 14.8 | 18.7 | 20.3 | 19.0 | 21.8 | 23.3 | 21.5 | 25.3 | 11.2 | <0.001 | 1.93 | 1.49 | 2.49 | 8.3  | <0.001 | 1.68 | 1.31 | 2.16 |
| New Mexico     | 12.4 | 9.9  | 15.4 | 19.7 | 17.7 | 21.8 | 23.6 | 21.4 | 25.8 | 28.2 | 25.5 | 31.1 | 15.9 | <0.001 | 2.29 | 1.79 | 2.91 | 11.2 | <0.001 | 1.91 | 1.5  | 2.42 |
| New York       | 12.3 | 10.6 | 14.4 | 17.4 | 15.5 | 19.4 | 20.1 | 18.6 | 21.8 | 24.2 | 22.3 | 26.2 | 11.8 | <0.001 | 1.96 | 1.65 | 2.33 | 7.8  | <0.001 | 1.63 | 1.37 | 1.94 |
| North Carolina | 15.7 | 13.9 | 17.7 | 20.6 | 18.5 | 23.0 | 25.4 | 24.2 | 26.7 | 29.2 | 27.1 | 31.3 | 13.5 | <0.001 | 1.86 | 1.62 | 2.13 | 9.7  | <0.001 | 1.62 | 1.42 | 1.84 |
| North Dakota   | 15.7 | 13.4 | 18.4 | 18.1 | 15.6 | 20.9 | 25.1 | 22.8 | 27.6 | 27.2 | 24.5 | 30.2 | 11.5 | <0.001 | 1.73 | 1.43 | 2.10 | 9.4  | <0.001 | 1.6  | 1.33 | 1.93 |
| Ohio           | 14.9 | 12.0 | 18.4 | 21.6 | 19.0 | 24.4 | 24.3 | 22.0 | 26.8 | 28.2 | 26.1 | 30.5 | 13.3 | <0.001 | 1.90 | 1.51 | 2.38 | 9.4  | <0.001 | 1.63 | 1.29 | 2.06 |
| Oklahoma       | 13.6 | 11.3 | 16.3 | 21.2 | 19.1 | 23.3 | 27.8 | 25.8 | 29.8 | 31.5 | 29.3 | 33.9 | 17.9 | <0.001 | 2.32 | 1.91 | 2.82 | 14.2 | <0.001 | 2.04 | 1.68 | 2.48 |
| Oregon         | 13.9 | 12.2 | 15.8 | 20.6 | 18.6 | 22.8 | 23.5 | 22.2 | 25.0 | 27.5 | 24.4 | 30.8 | 13.6 | <0.001 | 1.98 | 1.67 | 2.35 | 9.7  | <0.001 | 1.69 | 1.47 | 1.95 |
| Pennsylvania   | 14.7 | 13.0 | 16.5 | 20.4 | 18.4 | 22.6 | 23.7 | 22.0 | 25.5 | 27.3 | 25.5 | 29.3 | 12.6 | <0.001 | 1.86 | 1.62 | 2.14 | 9.0  | <0.001 | 1.62 | 1.4  | 1.86 |
| Rhode Island   | 13.7 | 11.3 | 16.6 | 15.7 | 13.9 | 17.6 | 20.4 | 18.2 | 22.9 | 26.6 | 24.0 | 29.4 | 12.9 | <0.001 | 1.94 | 1.56 | 2.41 | 6.7  | <0.001 | 1.49 | 1.19 | 1.86 |
| South Carolina | 16.2 | 13.9 | 18.9 | 21.7 | 19.6 | 23.8 | 30.1 | 28.3 | 32.0 | 33.5 | 30.4 | 36.7 | 17.3 | <0.001 | 2.06 | 1.72 | 2.47 | 13.9 | <0.001 | 1.86 | 1.57 | 2.19 |
| South Dakota   | 13.3 | 11.1 | 15.7 | 18.8 | 17.2 | 20.6 | 24.9 | 22.9 | 27.1 | 29.0 | 26.4 | 31.8 | 15.8 | <0.001 | 2.19 | 1.80 | 2.67 | 11.7 | <0.001 | 1.88 | 1.55 | 2.28 |
| Tennessee      | 18.1 | 15.9 | 20.6 | 21.9 | 19.6 | 24.3 | 28.1 | 25.1 | 31.2 | 33.4 | 30.3 | 36.7 | 15.3 | <0.001 | 1.84 | 1.57 | 2.17 | 10.0 | <0.001 | 1.55 | 1.31 | 1.84 |
| Texas          | 15.7 | 13.2 | 18.5 | 24.1 | 22.3 | 26.1 | 27.7 | 25.7 | 29.8 | 32.2 | 30.0 | 34.5 | 16.5 | <0.001 | 2.06 | 1.71 | 2.47 | 12.1 | <0.001 | 1.77 | 1.47 | 2.13 |
| Utah           | 12.8 | 10.9 | 14.9 | 18.1 | 15.9 | 20.6 | 19.9 | 18.1 | 21.9 | 22.4 | 20.8 | 24.1 | 9.6  | <0.001 | 1.75 | 1.47 | 2.09 | 7.1  | <0.001 | 1.56 | 1.3  | 1.87 |
| Vermont        | 13.9 | 12.0 | 16.0 | 15.4 | 13.7 | 17.2 | 20.4 | 18.7 | 22.1 | 24.5 | 22.3 | 26.9 | 10.6 | <0.001 | 1.76 | 1.48 | 2.10 | 6.5  | <0.001 | 1.46 | 1.24 | 1.73 |
| Virginia       | 15.2 | 13.0 | 17.6 | 17.7 | 15.4 | 20.3 | 25.2 | 23.0 | 27.5 | 26.0 | 22.8 | 29.4 | 10.8 | <0.001 | 1.71 | 1.40 | 2.09 | 10.0 | <0.001 | 1.66 | 1.39 | 1.98 |
| Washington     | 13.5 | 11.9 | 15.2 | 17.5 | 15.7 | 19.4 | 22.7 | 21.6 | 23.7 | 26.3 | 24.8 | 27.9 | 12.8 | <0.001 | 1.95 | 1.70 | 2.23 | 9.2  | <0.001 | 1.68 | 1.47 | 1.91 |
| West Virginia  | 19.3 | 17.1 | 21.7 | 24.1 | 21.5 | 26.9 | 31.2 | 28.5 | 34.0 | 35.0 | 31.8 | 38.3 | 15.7 | <0.001 | 1.81 | 1.56 | 2.11 | 11.9 | <0.001 | 1.62 | 1.4  | 1.88 |
| Wisconsin      | 14.0 | 11.9 | 16.5 | 17.4 | 15.4 | 19.6 | 22.7 | 20.6 | 24.9 | 26.6 | 23.4 | 30.0 | 12.6 | <0.001 | 1.89 | 1.54 | 2.33 | 8.7  | <0.001 | 1.62 | 1.34 | 1.96 |
| Wyoming        | 13.3 | 11.5 | 15.3 | 16.5 | 14.3 | 18.9 | 24.1 | 22.0 | 26.2 | 26.5 | 23.9 | 29.4 | 13.3 | <0.001 | 2.00 | 1.68 | 2.39 | 10.8 | <0.001 | 1.81 | 1.53 | 2.14 |

CI = confidence interval

\*Obesity was defined as body mass index  $\geq 30$  kg/m<sup>2</sup>. Estimates were weighted to account for complex survey design and non-response.

†P-values were based on 2-sided Wald Chi-Squared test

‡Data are not available.

**Supplementary Table 8. Obesity Prevalence among Non-Hispanic White Adults aged 20-49 years by State, Behavioral Risk Factor Surveillance System 1995, 2000, 2005, and 2010\***

| State                | 1995 (n=52,431) |           |       |           | 2000 (n=75,237) |           |       |           | 2005 (n=112,510) |        |       |           | 2010 (n=95,778) |        |       |           | 2010 vs 1995        |                  |    | 2005 vs 1995        |                  |          |    |
|----------------------|-----------------|-----------|-------|-----------|-----------------|-----------|-------|-----------|------------------|--------|-------|-----------|-----------------|--------|-------|-----------|---------------------|------------------|----|---------------------|------------------|----------|----|
|                      | %               |           | 95%CI |           | %               |           | 95%CI |           | %                |        | 95%CI |           | %               |        | 95%CI |           | Absolute difference | Prevalence ratio |    | Absolute difference | Prevalence ratio |          |    |
|                      | %               | 95%CI     | %     | 95%CI     | %               | 95%CI     | %     | 95%CI     | %                | 95%CI  | %     | 95%CI     | %               | 95%CI  | %     | 95%CI     | %                   | P-value†         | PR | 95%CI               | %                | P-value† | PR |
| Total                | 13.8            | 13.3 14.3 | 18.2  | 17.8 18.7 | 22.5            | 22.1 22.9 | 26.1  | 25.6 26.6 | 12.3             | <0.001 | 1.89  | 1.82 1.97 | 8.7             | <0.001 | 1.63  | 1.57 1.7  |                     |                  |    |                     |                  |          |    |
| Alabama              | 16.3            | 13.4 19.7 | 22.0  | 18.7 25.5 | 25.8            | 22.6 29.3 | 29.5  | 26.4 32.9 | 13.2             | <0.001 | 1.81  | 1.45 2.25 | 9.5             | <0.001 | 1.58  | 1.25 1.99 |                     |                  |    |                     |                  |          |    |
| Alaska               | 17.9            | 14.4 22.0 | 17.6  | 14.6 21.1 | 22.0            | 18.7 25.8 | 21.4  | 16.9 26.8 | 3.5              | 0.21   | 1.19  | 0.87 1.64 | 4.1             | 0.12   | 1.23  | 0.94 1.6  |                     |                  |    |                     |                  |          |    |
| Arizona              | 15.0            | 11.4 19.4 | 15.2  | 12.0 19.1 | 18.6            | 14.9 23.0 | 24.8  | 20.7 29.5 | 9.8              | 0.002  | 1.66  | 1.20 2.28 | 3.6             | 0.21   | 1.24  | 0.88 1.75 |                     |                  |    |                     |                  |          |    |
| Arkansas             | 14.3            | 11.9 17.1 | 23.4  | 20.6 26.4 | 28.6            | 26.1 31.2 | 33.1  | 28.7 37.8 | 18.8             | <0.001 | 2.32  | 1.84 2.91 | 14.3            | <0.001 | 2     | 1.63 2.46 |                     |                  |    |                     |                  |          |    |
| California           | 11.3            | 9.1 14.0  | 17.3  | 15.0 19.8 | 19.3            | 17.0 21.9 | 20.6  | 18.9 22.4 | 9.3              | <0.001 | 1.82  | 1.44 2.29 | 8.0             | <0.001 | 1.71  | 1.33 2.19 |                     |                  |    |                     |                  |          |    |
| Colorado             | 8.7             | 6.9 10.8  | 12.3  | 10.1 14.9 | 15.7            | 14.0 17.5 | 21.0  | 19.0 23.0 | 12.3             | <0.001 | 2.42  | 1.89 3.08 | 7.0             | <0.001 | 1.81  | 1.41 2.32 |                     |                  |    |                     |                  |          |    |
| Connecticut          | 11.0            | 8.9 13.5  | 14.4  | 12.6 16.4 | 18.1            | 15.9 20.4 | 20.8  | 18.2 23.7 | 9.9              | <0.001 | 1.90  | 1.48 2.43 | 7.1             | <0.001 | 1.65  | 1.29 2.1  |                     |                  |    |                     |                  |          |    |
| Delaware             | 13.9            | 11.6 16.6 | 13.4  | 11.1 16.0 | 22.6            | 19.8 25.7 | 24.8  | 21.4 28.5 | 10.9             | <0.001 | 1.78  | 1.42 2.24 | 8.7             | <0.001 | 1.63  | 1.3 2.03  |                     |                  |    |                     |                  |          |    |
| District of Columbia | ‡               | 6.9       | 4.5   | 10.4      | 7.2             | 5.5       | 9.3   | 8.5       | 6.6              | 10.9   | ‡     | ‡         | ‡               | ‡      | ‡     | ‡         |                     |                  |    |                     |                  |          |    |
| Florida              | 15.7            | 13.5 18.2 | 17.8  | 15.8 20.1 | 19.4            | 17.0 22.0 | 26.4  | 24.4 28.6 | 10.7             | <0.001 | 1.68  | 1.42 1.99 | 3.7             | 0.04   | 1.23  | 1.01 1.5  |                     |                  |    |                     |                  |          |    |
| Georgia              | 11.4            | 9.4 13.8  | 19.2  | 17.0 21.7 | 23.1            | 20.7 25.8 | 28.2  | 25.1 31.5 | 16.8             | <0.001 | 2.47  | 1.97 3.09 | 11.7            | <0.001 | 2.03  | 1.62 2.53 |                     |                  |    |                     |                  |          |    |
| Hawaii               | 7.3             | 5.0 10.6  | 12.0  | 9.6 15.0  | 15.2            | 12.1 18.9 | 19.0  | 15.1 23.6 | 11.7             | <0.001 | 2.60  | 1.68 4.04 | 7.9             | <0.001 | 2.09  | 1.35 3.23 |                     |                  |    |                     |                  |          |    |
| Idaho                | 13.1            | 11.3 15.2 | 17.3  | 15.7 19.1 | 22.2            | 20.1 24.5 | 26.3  | 23.6 29.1 | 13.2             | <0.001 | 2.00  | 1.67 2.40 | 9.1             | <0.001 | 1.69  | 1.42 2.02 |                     |                  |    |                     |                  |          |    |
| Illinois             | 14.2            | 12.1 16.5 | 17.1  | 15.2 19.2 | 21.9            | 19.8 24.2 | 23.9  | 21.0 27.2 | 9.8              | <0.001 | 1.69  | 1.38 2.07 | 7.8             | <0.001 | 1.55  | 1.29 1.86 |                     |                  |    |                     |                  |          |    |
| Indiana              | 18.9            | 16.8 21.3 | 20.0  | 17.7 22.4 | 25.6            | 23.6 27.8 | 28.3  | 26.0 30.6 | 9.4              | <0.001 | 1.49  | 1.29 1.73 | 6.7             | <0.001 | 1.36  | 1.17 1.57 |                     |                  |    |                     |                  |          |    |
| Iowa                 | 16.7            | 14.9 18.6 | 19.7  | 17.6 22.0 | 23.8            | 21.7 26.1 | 28.8  | 26.0 31.8 | 12.1             | <0.001 | 1.72  | 1.49 2.00 | 7.1             | <0.001 | 1.43  | 1.23 1.65 |                     |                  |    |                     |                  |          |    |
| Kansas               | 15.0            | 12.8 17.6 | 19.9  | 18.0 21.9 | 23.2            | 21.5 25.0 | 29.8  | 27.5 32.3 | 14.8             | <0.001 | 1.98  | 1.65 2.38 | 8.2             | <0.001 | 1.54  | 1.29 1.85 |                     |                  |    |                     |                  |          |    |
| Kentucky             | 15.7            | 13.5 18.2 | 24.1  | 22.0 26.4 | 27.5            | 25.1 30.0 | 31.3  | 28.3 34.4 | 15.5             | <0.001 | 1.99  | 1.66 2.38 | 11.7            | <0.001 | 1.75  | 1.47 2.08 |                     |                  |    |                     |                  |          |    |
| Louisiana            | 14.4            | 11.9 17.4 | 18.6  | 16.6 20.7 | 25.9            | 22.7 29.3 | 25.3  | 22.6 28.3 | 10.9             | <0.001 | 1.76  | 1.41 2.19 | 11.5            | <0.001 | 1.79  | 1.43 2.26 |                     |                  |    |                     |                  |          |    |
| Maine                | 13.2            | 10.6 16.3 | 19.6  | 17.1 22.4 | 24.5            | 22.1 27.0 | 28.1  | 25.8 30.4 | 14.9             | <0.001 | 2.13  | 1.69 2.69 | 11.3            | <0.001 | 1.86  | 1.46 2.36 |                     |                  |    |                     |                  |          |    |
| Maryland             | 14.1            | 12.5 15.9 | 16.2  | 14.3 18.3 | 19.3            | 17.6 21.1 | 27.1  | 24.3 29.9 | 12.9             | <0.001 | 1.92  | 1.64 2.24 | 5.2             | <0.001 | 1.37  | 1.18 1.59 |                     |                  |    |                     |                  |          |    |
| Massachusetts        | 9.1             | 7.2 11.4  | 14.3  | 12.9 15.7 | 20.4            | 18.5 22.4 | 22.4  | 20.6 24.3 | 13.3             | <0.001 | 2.47  | 1.92 3.17 | 11.3            | <0.001 | 2.25  | 1.74 2.9  |                     |                  |    |                     |                  |          |    |
| Michigan             | 14.8            | 12.8 17.1 | 19.6  | 17.2 22.3 | 24.6            | 23.1 26.1 | 29.3  | 26.8 31.9 | 14.5             | <0.001 | 1.98  | 1.67 2.34 | 9.8             | <0.001 | 1.66  | 1.42 1.94 |                     |                  |    |                     |                  |          |    |
| Minnesota            | 15.1            | 13.5 16.8 | 16.1  | 14.1 18.3 | 22.0            | 19.3 25.0 | 23.5  | 20.8 26.5 | 8.4              | <0.001 | 1.56  | 1.32 1.84 | 6.9             | <0.001 | 1.46  | 1.23 1.73 |                     |                  |    |                     |                  |          |    |
| Mississippi          | 16.7            | 13.6 20.3 | 21.2  | 18.2 24.7 | 27.7            | 24.6 31.0 | 32.3  | 29.0 35.7 | 15.6             | <0.001 | 1.93  | 1.54 2.42 | 11.0            | <0.001 | 1.66  | 1.32 2.09 |                     |                  |    |                     |                  |          |    |
| Missouri             | 19.2            | 16.2 22.6 | 20.5  | 18.1 23.1 | 27.3            | 24.5 30.3 | 31.7  | 28.0 35.6 | 12.5             | <0.001 | 1.65  | 1.34 2.03 | 8.1             | <0.001 | 1.42  | 1.17 1.73 |                     |                  |    |                     |                  |          |    |
| Montana              | 12.8            | 10.2 15.9 | 14.3  | 12.1 16.9 | 17.2            | 15.1 19.5 | 22.1  | 19.3 25.2 | 9.3              | <0.001 | 1.72  | 1.33 2.23 | 4.4             | 0.02   | 1.34  | 1.04 1.73 |                     |                  |    |                     |                  |          |    |
| Nebraska             | 14.8            | 12.5 17.5 | 20.5  | 18.2 23.1 | 25.0            | 22.9 27.1 | 27.1  | 24.6 29.6 | 12.2             | <0.001 | 1.82  | 1.51 2.21 | 10.2            | <0.001 | 1.68  | 1.4 2.03  |                     |                  |    |                     |                  |          |    |
| Nevada               | 12.4            | 10.0 15.3 | 16.8  | 13.7 20.4 | 22.1            | 18.2 26.5 | 20.2  | 16.7 24.1 | 7.7              | <0.001 | 1.62  | 1.22 2.15 | 9.6             | <0.001 | 1.78  | 1.33 2.36 |                     |                  |    |                     |                  |          |    |

|                |      |      |      |      |      |      |      |      |      |      |      |      |      |        |      |      |      |      |        |      |      |      |
|----------------|------|------|------|------|------|------|------|------|------|------|------|------|------|--------|------|------|------|------|--------|------|------|------|
| New Hampshire  | 14.1 | 11.7 | 17.0 | 16.2 | 13.7 | 19.1 | 21.9 | 20.0 | 23.9 | 26.5 | 23.9 | 29.2 | 12.3 | <0.001 | 1.87 | 1.51 | 2.32 | 7.7  | <0.001 | 1.55 | 1.26 | 1.9  |
| New Jersey     | 10.7 | 7.9  | 14.3 | 16.4 | 14.3 | 18.8 | 19.6 | 18.0 | 21.3 | 21.7 | 19.6 | 24.0 | 11.0 | <0.001 | 2.04 | 1.48 | 2.79 | 8.9  | <0.001 | 1.84 | 1.34 | 2.51 |
| New Mexico     | 12.0 | 9.0  | 15.9 | 15.0 | 12.5 | 17.8 | 19.5 | 16.9 | 22.4 | 21.0 | 17.4 | 25.1 | 9.0  | <0.001 | 1.75 | 1.25 | 2.46 | 7.5  | 0.001  | 1.63 | 1.18 | 2.24 |
| New York       | 11.6 | 9.6  | 14.1 | 16.3 | 14.1 | 18.7 | 19.9 | 18.1 | 21.8 | 23.3 | 21.1 | 25.6 | 11.7 | <0.001 | 2.00 | 1.61 | 2.48 | 8.3  | <0.001 | 1.71 | 1.38 | 2.12 |
| North Carolina | 12.8 | 10.9 | 14.9 | 18.3 | 15.9 | 21.1 | 22.9 | 21.5 | 24.4 | 26.0 | 23.7 | 28.5 | 13.3 | <0.001 | 2.04 | 1.70 | 2.44 | 10.2 | <0.001 | 1.79 | 1.52 | 2.12 |
| North Dakota   | 15.3 | 12.9 | 18.0 | 17.4 | 14.9 | 20.2 | 23.6 | 21.2 | 26.1 | 26.6 | 23.7 | 29.7 | 11.3 | <0.001 | 1.74 | 1.42 | 2.12 | 8.3  | <0.001 | 1.54 | 1.27 | 1.87 |
| Ohio           | 14.9 | 11.7 | 18.8 | 20.9 | 18.1 | 23.9 | 23.6 | 21.1 | 26.3 | 27.4 | 25.0 | 29.9 | 12.5 | <0.001 | 1.84 | 1.43 | 2.36 | 8.7  | <0.001 | 1.58 | 1.22 | 2.05 |
| Oklahoma       | 13.4 | 10.9 | 16.3 | 19.7 | 17.5 | 22.1 | 27.1 | 24.9 | 29.4 | 29.0 | 26.3 | 31.8 | 15.6 | <0.001 | 2.17 | 1.74 | 2.71 | 13.7 | <0.001 | 2.03 | 1.63 | 2.52 |
| Oregon         | 13.5 | 11.8 | 15.4 | 20.4 | 18.2 | 22.8 | 22.5 | 21.1 | 24.1 | 27.9 | 24.5 | 31.6 | 14.5 | <0.001 | 2.08 | 1.73 | 2.50 | 9.1  | <0.001 | 1.68 | 1.44 | 1.95 |
| Pennsylvania   | 13.7 | 11.9 | 15.6 | 18.8 | 16.7 | 21.0 | 22.5 | 20.8 | 24.3 | 26.4 | 24.5 | 28.5 | 12.8 | <0.001 | 1.94 | 1.66 | 2.26 | 8.8  | <0.001 | 1.65 | 1.41 | 1.92 |
| Rhode Island   | 13.7 | 11.0 | 16.8 | 15.6 | 13.7 | 17.8 | 21.0 | 18.4 | 23.9 | 25.2 | 22.4 | 28.2 | 11.5 | <0.001 | 1.84 | 1.44 | 2.35 | 7.3  | <0.001 | 1.54 | 1.2  | 1.97 |
| South Carolina | 14.6 | 12.1 | 17.6 | 17.5 | 15.4 | 19.8 | 26.4 | 24.4 | 28.4 | 29.6 | 26.1 | 33.3 | 15.0 | <0.001 | 2.03 | 1.62 | 2.53 | 11.8 | <0.001 | 1.8  | 1.47 | 2.21 |
| South Dakota   | 12.8 | 10.6 | 15.3 | 18.2 | 16.5 | 20.0 | 24.3 | 22.1 | 26.6 | 27.7 | 24.9 | 30.7 | 15.0 | <0.001 | 2.17 | 1.76 | 2.69 | 11.5 | <0.001 | 1.9  | 1.55 | 2.34 |
| Tennessee      | 17.7 | 15.3 | 20.3 | 20.6 | 18.2 | 23.3 | 25.8 | 23.2 | 28.6 | 32.9 | 29.4 | 36.5 | 15.2 | <0.001 | 1.86 | 1.55 | 2.22 | 8.1  | <0.001 | 1.46 | 1.22 | 1.74 |
| Texas          | 13.8 | 11.0 | 17.2 | 20.6 | 18.5 | 22.9 | 25.4 | 22.7 | 28.2 | 27.6 | 24.8 | 30.5 | 13.7 | <0.001 | 2.00 | 1.56 | 2.55 | 11.6 | <0.001 | 1.84 | 1.43 | 2.35 |
| Utah           | 12.1 | 10.2 | 14.3 | 17.3 | 15.0 | 19.9 | 18.8 | 17.0 | 20.8 | 21.3 | 19.6 | 23.1 | 9.2  | <0.001 | 1.76 | 1.46 | 2.11 | 6.7  | <0.001 | 1.56 | 1.28 | 1.89 |
| Vermont        | 13.3 | 11.4 | 15.5 | 15.9 | 14.2 | 17.8 | 20.2 | 18.6 | 22.0 | 24.6 | 22.2 | 27.1 | 11.3 | <0.001 | 1.85 | 1.54 | 2.22 | 6.9  | <0.001 | 1.52 | 1.28 | 1.81 |
| Virginia       | 14.9 | 12.4 | 17.8 | 16.1 | 13.5 | 19.1 | 23.1 | 20.6 | 25.7 | 25.9 | 22.5 | 29.6 | 11.0 | <0.001 | 1.74 | 1.39 | 2.18 | 8.2  | <0.001 | 1.55 | 1.25 | 1.91 |
| Washington     | 13.3 | 11.7 | 15.2 | 17.2 | 15.3 | 19.3 | 22.0 | 20.9 | 23.2 | 25.4 | 23.7 | 27.1 | 12.0 | <0.001 | 1.90 | 1.64 | 2.20 | 8.7  | <0.001 | 1.65 | 1.43 | 1.9  |
| West Virginia  | 19.2 | 16.9 | 21.7 | 24.0 | 21.3 | 26.9 | 31.4 | 28.6 | 34.3 | 34.9 | 31.6 | 38.3 | 15.7 | <0.001 | 1.82 | 1.56 | 2.13 | 12.2 | <0.001 | 1.64 | 1.4  | 1.91 |
| Wisconsin      | 13.9 | 11.6 | 16.6 | 16.3 | 14.2 | 18.7 | 22.2 | 20.0 | 24.6 | 25.6 | 22.4 | 29.1 | 11.7 | <0.001 | 1.85 | 1.48 | 2.31 | 8.3  | <0.001 | 1.6  | 1.3  | 1.97 |
| Wyoming        | 13.5 | 11.6 | 15.7 | 15.8 | 13.6 | 18.2 | 23.1 | 21.0 | 25.3 | 25.1 | 22.4 | 27.9 | 11.5 | <0.001 | 1.85 | 1.54 | 2.23 | 9.6  | <0.001 | 1.71 | 1.43 | 2.04 |

CI = confidence interval

\*Obesity was defined as body mass index  $\geq 30$  kg/m<sup>2</sup>. Estimates were weighted to account for complex survey design and non-response.

†P-values were based on 2-sided Wald Chi-Squared test

‡Data are not available.

**Supplementary Table 9. Prevalence of Heavy Alcohol Use among Adults aged 20-49 years by State, Behavioral Risk Factor Surveillance System 1995, 2005, and 2010\***

| State                | 1995 (n=63,967) |       |     | 2005 (n=157,350) |       |      | 2010 (n=137,311) |       |      | Absolute difference 2005 vs 1995 |          | Prevalence ratios comparing 2005 vs 1995 |       |      |
|----------------------|-----------------|-------|-----|------------------|-------|------|------------------|-------|------|----------------------------------|----------|------------------------------------------|-------|------|
|                      | %               | 95%CI |     | %                | 95%CI |      | %                | 95%CI |      | %                                | P-value† | PR                                       | 95%CI |      |
| Total                | 4.5             | 4.2   | 4.7 | 5.9              | 5.7   | 6.2  | 5.4              | 5.2   | 5.6  | 1.5                              | <0.001   | 1.32                                     | 1.23  | 1.43 |
| Alabama              | 3.6             | 2.6   | 5.0 | 5.9              | 4.3   | 7.9  | 5.5              | 4.2   | 7.2  | 2.3                              | 0.04     | 1.63                                     | 1.05  | 2.53 |
| Alaska               | 5.1             | 3.6   | 7.1 | 5.7              | 4.2   | 7.8  | 6.6              | 4.4   | 9.8  | 0.6                              | 0.63     | 1.12                                     | 0.71  | 1.78 |
| Arizona              | 3.7             | 2.5   | 5.4 | 7.2              | 5.3   | 9.9  | 5.0              | 3.7   | 6.8  | 3.6                              | 0.01     | 1.97                                     | 1.19  | 3.26 |
| Arkansas             | 2.9             | 2.0   | 4.3 | 3.5              | 2.6   | 4.6  | 3.4              | 2.3   | 5.2  | 0.6                              | 0.45     | 1.20                                     | 0.74  | 1.92 |
| California           |                 | ‡     |     | 6.9              | 5.7   | 8.3  | 6.1              | 5.3   | 7.0  |                                  |          |                                          | ‡     |      |
| Colorado             | 6.4             | 4.9   | 8.2 | 5.4              | 4.4   | 6.5  | 5.2              | 4.3   | 6.2  | -1.0                             | 0.33     | 0.85                                     | 0.61  | 1.17 |
| Connecticut          | 5.7             | 4.5   | 7.4 | 6.1              | 4.9   | 7.6  | 5.7              | 4.3   | 7.5  | 0.4                              | 0.69     | 1.07                                     | 0.77  | 1.49 |
| Delaware             | 3.9             | 2.8   | 5.3 | 5.6              | 4.3   | 7.2  | 6.6              | 4.9   | 8.9  | 1.7                              | 0.08     | 1.43                                     | 0.95  | 2.16 |
| District of Columbia |                 | ‡     |     | 6.5              | 5.2   | 8.0  | 6.8              | 5.3   | 8.6  |                                  | ‡        |                                          | ‡     |      |
| Florida              | 6.6             | 5.4   | 8.0 | 7.6              | 6.4   | 9.1  | 5.3              | 4.4   | 6.2  | 1.1                              | 0.26     | 1.16                                     | 0.89  | 1.50 |
| Georgia              | 4.5             | 3.5   | 5.8 | 4.5              | 3.5   | 5.7  | 3.9              | 2.9   | 5.1  | 0.0                              | 0.98     | 1.00                                     | 0.70  | 1.41 |
| Hawaii               | 4.0             | 3.0   | 5.3 | 8.4              | 7.1   | 9.9  | 7.0              | 5.6   | 8.6  | 4.4                              | <0.001   | 2.09                                     | 1.50  | 2.91 |
| Idaho                | 3.9             | 3.0   | 5.2 | 4.8              | 3.8   | 5.9  | 4.0              | 3.1   | 5.3  | 0.8                              | 0.27     | 1.22                                     | 0.86  | 1.73 |
| Illinois             | 4.8             | 3.2   | 7.1 | 7.5              | 6.3   | 9.0  | 6.4              | 5.0   | 8.1  | 2.8                              | 0.02     | 1.59                                     | 1.02  | 2.46 |
| Indiana              | 4.6             | 3.4   | 6.0 | 5.2              | 4.2   | 6.4  | 4.1              | 3.3   | 5.3  | 0.6                              | 0.48     | 1.13                                     | 0.79  | 1.62 |
| Iowa                 | 6.6             | 5.4   | 8.0 | 6.8              | 5.6   | 8.3  | 6.4              | 4.9   | 8.3  | 0.3                              | 0.77     | 1.04                                     | 0.79  | 1.38 |
| Kansas               | 5.2             | 3.9   | 7.0 | 4.0              | 3.3   | 4.9  | 4.4              | 3.5   | 5.5  | -1.2                             | 0.19     | 0.77                                     | 0.54  | 1.11 |
| Kentucky             | 2.1             | 1.4   | 3.3 | 3.3              | 2.3   | 4.6  | 4.3              | 3.3   | 5.6  | 1.1                              | 0.13     | 1.52                                     | 0.88  | 2.63 |
| Louisiana            | 4.6             | 3.4   | 6.2 | 6.0              | 4.7   | 7.7  | 6.6              | 5.3   | 8.2  | 1.4                              | 0.17     | 1.31                                     | 0.89  | 1.95 |
| Maine                | 2.6             | 1.7   | 4.0 | 6.8              | 5.5   | 8.5  | 5.1              | 4.0   | 6.3  | 4.2                              | <0.001   | 2.62                                     | 1.61  | 4.28 |
| Maryland             | 3.1             | 2.5   | 3.9 | 4.8              | 4.0   | 5.7  | 5.7              | 4.5   | 7.4  | 1.7                              | 0.003    | 1.54                                     | 1.15  | 2.07 |
| Massachusetts        | 5.0             | 3.7   | 6.8 | 7.4              | 6.3   | 8.8  | 7.3              | 6.3   | 8.4  | 2.4                              | 0.02     | 1.48                                     | 1.04  | 2.09 |
| Michigan             | 4.7             | 3.6   | 6.2 | 6.8              | 6.0   | 7.8  | 6.1              | 5.0   | 7.4  | 2.1                              | 0.009    | 1.44                                     | 1.07  | 1.93 |
| Minnesota            | 6.1             | 5.1   | 7.3 | 5.5              | 4.1   | 7.3  | 5.3              | 3.9   | 7.1  | -0.6                             | 0.53     | 0.90                                     | 0.63  | 1.27 |
| Mississippi          | 3.3             | 2.2   | 5.0 | 4.4              | 3.3   | 5.9  | 3.6              | 2.7   | 4.7  | 1.1                              | 0.24     | 1.33                                     | 0.81  | 2.19 |
| Missouri             | 4.6             | 3.1   | 6.7 | 6.1              | 4.4   | 8.2  | 7.8              | 6.0   | 10.2 | 1.5                              | 0.26     | 1.32                                     | 0.81  | 2.16 |
| Montana              | 3.0             | 2.0   | 4.7 | 7.1              | 5.6   | 9.0  | 5.6              | 4.4   | 7.1  | 4.1                              | <0.001   | 2.35                                     | 1.43  | 3.85 |
| Nebraska             | 3.0             | 2.1   | 4.3 | 5.5              | 4.4   | 6.8  | 6.9              | 5.5   | 8.6  | 2.4                              | 0.004    | 1.79                                     | 1.17  | 2.74 |
| Nevada               | 6.6             | 5.0   | 8.5 | 8.4              | 6.6   | 10.6 | 6.1              | 4.6   | 8.0  | 1.8                              | 0.18     | 1.28                                     | 0.89  | 1.82 |
| New Hampshire        | 4.8             | 3.6   | 6.5 | 6.1              | 5.1   | 7.2  | 7.4              | 6.0   | 9.1  | 1.2                              | 0.18     | 1.26                                     | 0.89  | 1.78 |
| New Jersey           | 4.9             | 3.2   | 7.5 | 4.4              | 3.7   | 5.1  | 4.8              | 3.9   | 5.9  | -0.6                             | 0.62     | 0.89                                     | 0.56  | 1.40 |

|                |     |     |     |     |     |      |     |     |      |      |       |      |      |      |
|----------------|-----|-----|-----|-----|-----|------|-----|-----|------|------|-------|------|------|------|
| New Mexico     | 4.8 | 3.3 | 6.9 | 4.3 | 3.4 | 5.5  | 5.1 | 3.9 | 6.6  | -0.5 | 0.65  | 0.90 | 0.59 | 1.39 |
| New York       | 3.8 | 2.8 | 5.2 | 5.1 | 4.3 | 6.1  | 4.4 | 3.6 | 5.3  | 1.3  | 0.09  | 1.34 | 0.94 | 1.91 |
| North Carolina | 2.9 | 2.1 | 4.0 | 3.3 | 2.8 | 3.9  | 4.1 | 3.2 | 5.2  | 0.4  | 0.44  | 1.15 | 0.80 | 1.64 |
| North Dakota   | 3.8 | 2.8 | 5.2 | 6.2 | 4.7 | 8.1  | 5.6 | 4.2 | 7.4  | 2.4  | 0.02  | 1.62 | 1.07 | 2.46 |
| Ohio           | 3.0 | 1.9 | 4.7 | 5.8 | 4.6 | 7.4  | 6.2 | 5.1 | 7.7  | 2.8  | 0.005 | 1.95 | 1.16 | 3.29 |
| Oklahoma       | 2.2 | 1.4 | 3.4 | 3.8 | 3.0 | 4.8  | 4.5 | 3.4 | 5.8  | 1.6  | 0.02  | 1.75 | 1.04 | 2.94 |
| Oregon         | 5.5 | 4.4 | 6.8 | 6.5 | 5.7 | 7.4  | 5.9 | 4.5 | 7.7  | 1.0  | 0.19  | 1.18 | 0.92 | 1.52 |
| Pennsylvania   | 6.6 | 5.3 | 8.3 | 5.9 | 5.0 | 7.0  | 4.6 | 3.8 | 5.6  | -0.8 | 0.42  | 0.89 | 0.67 | 1.18 |
| Rhode Island   | 6.5 | 4.7 | 8.9 | 6.1 | 4.7 | 7.9  | 5.6 | 4.4 | 7.0  | -0.4 | 0.78  | 0.94 | 0.62 | 1.43 |
| South Carolina | 3.8 | 2.8 | 5.1 | 5.9 | 4.9 | 7.1  | 5.3 | 4.0 | 6.9  | 2.2  | 0.008 | 1.57 | 1.10 | 2.24 |
| South Dakota   | 4.2 | 3.0 | 5.8 | 5.7 | 4.4 | 7.3  | 5.6 | 4.3 | 7.3  | 1.5  | 0.15  | 1.35 | 0.89 | 2.04 |
| Tennessee      | 1.7 | 1.1 | 2.7 | 4.1 | 3.0 | 5.5  | 2.5 | 1.6 | 3.7  | 2.4  | 0.002 | 2.39 | 1.38 | 4.11 |
| Texas          | 6.7 | 5.1 | 8.6 | 6.0 | 4.9 | 7.2  | 4.9 | 4.0 | 6.0  | -0.7 | 0.51  | 0.89 | 0.65 | 1.24 |
| Utah           | 1.9 | 1.3 | 2.9 | 3.5 | 2.7 | 4.4  | 3.3 | 2.6 | 4.2  | 1.5  | 0.01  | 1.79 | 1.10 | 2.92 |
| Vermont        | 7.2 | 5.8 | 8.8 | 7.6 | 6.4 | 8.9  | 8.5 | 7.0 | 10.3 | 0.4  | 0.68  | 1.06 | 0.81 | 1.39 |
| Virginia       | 5.5 | 4.1 | 7.2 | 5.2 | 4.1 | 6.7  | 6.9 | 5.2 | 9.1  | -0.2 | 0.83  | 0.96 | 0.66 | 1.39 |
| Washington     | 3.9 | 3.0 | 4.9 | 5.5 | 4.9 | 6.2  | 5.5 | 4.8 | 6.3  | 1.6  | 0.003 | 1.43 | 1.10 | 1.85 |
| West Virginia  | 2.3 | 1.5 | 3.5 | 4.1 | 3.0 | 5.6  | 3.6 | 2.6 | 5.1  | 1.8  | 0.03  | 1.78 | 1.06 | 2.97 |
| Wisconsin      | 7.5 | 5.8 | 9.6 | 9.2 | 7.8 | 11.0 | 7.2 | 5.6 | 9.2  | 1.8  | 0.17  | 1.23 | 0.91 | 1.68 |
| Wyoming        | 3.4 | 2.4 | 4.6 | 5.1 | 4.1 | 6.4  | 5.0 | 3.8 | 6.4  | 1.8  | 0.02  | 1.53 | 1.04 | 2.27 |

CI = confidence interval

\*Heavy alcohol use defined as >14 drinks per week for males and >7 drinks per week for females. Respondents missing data on alcohol were excluded.

†P-values were based on 2-sided Wald Chi-Squared test

‡Data are not available.



**Supplementary Table 10. Prevalence of Heavy Alcohol Use among Non-Hispanic White Adults aged 20-49 years by State, Behavioral Risk Factor Surveillance System 1995, 2005, and 2010\***

| State                | 1995 (n=51,475) |       |      | 2005 (n=115,360) |       |      | 2010 (n=97,391) |       |      | Absolute difference 2005 vs 1995 |          | Prevalence ratios comparing 2005 vs 1995 |       |      |
|----------------------|-----------------|-------|------|------------------|-------|------|-----------------|-------|------|----------------------------------|----------|------------------------------------------|-------|------|
|                      | %               | 95%CI |      | %                | 95%CI |      | %               | 95%CI |      | %                                | P-value† | PR                                       | 95%CI |      |
| Total                | 4.7             | 4.4   | 5.0  | 6.3              | 6.0   | 6.5  | 6.2             | 5.9   | 6.5  | 1.6                              | <0.001   | 1.33                                     | 1.23  | 1.44 |
| Alabama              | 3.5             | 2.4   | 5.1  | 5.2              | 3.7   | 7.4  | 4.7             | 3.2   | 6.7  | 1.8                              | 0.13     | 1.50                                     | 0.89  | 2.53 |
| Alaska               | 5.5             | 3.8   | 8.1  | 5.6              | 3.8   | 8.4  | 7.4             | 4.5   | 12.0 | 0.1                              | 0.96     | 1.02                                     | 0.58  | 1.77 |
| Arizona              | 3.8             | 2.3   | 6.0  | 8.0              | 5.6   | 11.5 | 6.0             | 4.1   | 8.6  | 4.3                              | 0.02     | 2.14                                     | 1.18  | 3.88 |
| Arkansas             | 2.6             | 1.6   | 4.0  | 3.4              | 2.5   | 4.5  | 3.7             | 2.3   | 5.9  | 0.8                              | 0.28     | 1.32                                     | 0.77  | 2.26 |
| California           |                 | ‡     |      | 7.4              | 5.9   | 9.4  | 8.5             | 7.4   | 9.9  |                                  | ‡        |                                          | ‡     |      |
| Colorado             | 7.0             | 5.3   | 9.2  | 6.2              | 5.0   | 7.6  | 5.6             | 4.6   | 6.7  | -0.8                             | 0.50     | 0.89                                     | 0.63  | 1.25 |
| Connecticut          | 5.8             | 4.3   | 7.6  | 6.8              | 5.3   | 8.6  | 7.0             | 5.2   | 9.3  | 1.0                              | 0.37     | 1.18                                     | 0.82  | 1.70 |
| Delaware             | 4.2             | 2.9   | 5.9  | 7.3              | 5.6   | 9.4  | 8.0             | 5.9   | 10.9 | 3.1                              | 0.01     | 1.74                                     | 1.12  | 2.71 |
| District of Columbia |                 | ‡     |      | 10.1             | 7.8   | 13.0 | 10.6            | 8.2   | 13.8 |                                  | ‡        |                                          | ‡     |      |
| Florida              | 7.3             | 5.9   | 9.0  | 9.2              | 7.5   | 11.2 | 7.2             | 6.0   | 8.6  | 1.9                              | 0.12     | 1.26                                     | 0.94  | 1.67 |
| Georgia              | 5.1             | 3.8   | 6.7  | 4.4              | 3.3   | 5.9  | 4.6             | 3.3   | 6.3  | -0.7                             | 0.50     | 0.87                                     | 0.58  | 1.31 |
| Hawaii               | 6.8             | 4.6   | 10.1 | 9.7              | 7.4   | 12.6 | 9.1             | 6.3   | 13.0 | 2.9                              | 0.13     | 1.42                                     | 0.88  | 2.30 |
| Idaho                | 3.7             | 2.8   | 5.0  | 4.8              | 3.8   | 6.0  | 4.2             | 3.2   | 5.5  | 1.1                              | 0.17     | 1.29                                     | 0.89  | 1.87 |
| Illinois             | 4.3             | 2.7   | 6.9  | 9.0              | 7.5   | 10.8 | 7.5             | 5.8   | 9.8  | 4.7                              | 0.001    | 2.08                                     | 1.25  | 3.45 |
| Indiana              | 4.5             | 3.3   | 6.1  | 5.1              | 4.0   | 6.4  | 4.3             | 3.4   | 5.5  | 0.5                              | 0.56     | 1.12                                     | 0.76  | 1.63 |
| Iowa                 | 6.6             | 5.4   | 8.1  | 6.8              | 5.5   | 8.3  | 6.5             | 4.9   | 8.5  | 0.2                              | 0.88     | 1.02                                     | 0.76  | 1.37 |
| Kansas               | 5.0             | 3.6   | 6.9  | 4.4              | 3.6   | 5.5  | 4.7             | 3.7   | 5.9  | -0.6                             | 0.54     | 0.88                                     | 0.60  | 1.31 |
| Kentucky             | 2.1             | 1.4   | 3.2  | 3.1              | 2.1   | 4.5  | 4.4             | 3.3   | 5.8  | 1.0                              | 0.18     | 1.48                                     | 0.83  | 2.64 |
| Louisiana            | 5.5             | 4.0   | 7.6  | 7.6              | 5.7   | 10.1 | 7.8             | 6.1   | 9.9  | 2.1                              | 0.15     | 1.38                                     | 0.89  | 2.13 |
| Maine                | 2.5             | 1.6   | 4.0  | 6.6              | 5.3   | 8.3  | 5.2             | 4.1   | 6.5  | 4.1                              | <0.001   | 2.61                                     | 1.58  | 4.33 |
| Maryland             | 3.7             | 2.9   | 4.8  | 6.3              | 5.1   | 7.6  | 6.8             | 5.3   | 8.6  | 2.5                              | 0.002    | 1.68                                     | 1.22  | 2.33 |
| Massachusetts        | 5.1             | 3.7   | 7.1  | 8.0              | 6.7   | 9.6  | 8.1             | 6.9   | 9.4  | 2.9                              | 0.01     | 1.57                                     | 1.07  | 2.29 |
| Michigan             | 4.7             | 3.5   | 6.3  | 7.3              | 6.3   | 8.4  | 6.5             | 5.2   | 8.1  | 2.6                              | 0.003    | 1.56                                     | 1.12  | 2.17 |
| Minnesota            | 6.0             | 5.0   | 7.3  | 5.6              | 4.1   | 7.6  | 5.9             | 4.3   | 8.1  | -0.4                             | 0.68     | 0.93                                     | 0.64  | 1.34 |
| Mississippi          | 3.6             | 2.3   | 5.6  | 4.5              | 3.0   | 6.5  | 3.6             | 2.5   | 5.0  | 0.9                              | 0.45     | 1.26                                     | 0.69  | 2.28 |
| Missouri             | 5.1             | 3.4   | 7.5  | 5.6              | 4.3   | 7.4  | 8.7             | 6.5   | 11.4 | 0.6                              | 0.67     | 1.11                                     | 0.68  | 1.81 |
| Montana              | 3.0             | 1.9   | 4.6  | 6.5              | 5.1   | 8.3  | 5.6             | 4.4   | 7.2  | 3.5                              | 0.001    | 2.20                                     | 1.31  | 3.69 |
| Nebraska             | 3.0             | 2.1   | 4.4  | 5.7              | 4.5   | 7.2  | 7.4             | 5.8   | 9.4  | 2.7                              | 0.003    | 1.88                                     | 1.21  | 2.93 |
| Nevada               | 6.7             | 5.0   | 8.9  | 8.0              | 5.8   | 10.9 | 8.3             | 6.1   | 11.2 | 1.3                              | 0.42     | 1.20                                     | 0.78  | 1.84 |
| New Hampshire        | 4.9             | 3.6   | 6.6  | 6.2              | 5.2   | 7.3  | 7.6             | 6.2   | 9.4  | 1.3                              | 0.16     | 1.27                                     | 0.89  | 1.82 |
| New Jersey           | 5.4             | 3.3   | 8.6  | 4.9              | 4.1   | 5.8  | 6.2             | 4.8   | 7.8  | -0.5                             | 0.73     | 0.91                                     | 0.55  | 1.51 |

|                |     |     |     |     |     |      |     |     |      |      |       |      |      |      |
|----------------|-----|-----|-----|-----|-----|------|-----|-----|------|------|-------|------|------|------|
| New Mexico     | 4.6 | 2.7 | 7.7 | 4.1 | 2.9 | 5.9  | 5.5 | 3.9 | 7.7  | -0.4 | 0.76  | 0.91 | 0.48 | 1.71 |
| New York       | 3.9 | 2.7 | 5.6 | 6.0 | 4.9 | 7.3  | 5.4 | 4.3 | 6.7  | 2.0  | 0.03  | 1.52 | 1.01 | 2.29 |
| North Carolina | 3.3 | 2.3 | 4.6 | 4.2 | 3.5 | 5.0  | 5.0 | 3.7 | 6.6  | 0.9  | 0.18  | 1.29 | 0.87 | 1.92 |
| North Dakota   | 3.6 | 2.5 | 5.0 | 6.7 | 5.1 | 8.7  | 5.7 | 4.2 | 7.7  | 3.1  | 0.005 | 1.87 | 1.21 | 2.89 |
| Ohio           | 2.7 | 1.6 | 4.5 | 5.9 | 4.5 | 7.6  | 6.6 | 5.2 | 8.2  | 3.2  | 0.004 | 2.17 | 1.21 | 3.90 |
| Oklahoma       | 1.9 | 1.2 | 3.1 | 3.1 | 2.3 | 4.1  | 4.4 | 3.2 | 6.0  | 1.2  | 0.07  | 1.63 | 0.92 | 2.87 |
| Oregon         | 5.2 | 4.2 | 6.5 | 6.6 | 5.8 | 7.5  | 6.2 | 4.8 | 8.0  | 1.4  | 0.07  | 1.26 | 0.97 | 1.63 |
| Pennsylvania   | 6.3 | 4.9 | 8.1 | 6.2 | 5.2 | 7.3  | 4.7 | 3.9 | 5.7  | -0.1 | 0.89  | 0.98 | 0.72 | 1.33 |
| Rhode Island   | 6.8 | 4.8 | 9.6 | 6.6 | 4.9 | 8.8  | 6.4 | 5.0 | 8.2  | -0.2 | 0.87  | 0.96 | 0.61 | 1.52 |
| South Carolina | 4.4 | 3.0 | 6.2 | 7.1 | 5.9 | 8.5  | 6.3 | 4.5 | 8.6  | 2.7  | 0.009 | 1.62 | 1.08 | 2.43 |
| South Dakota   | 4.2 | 3.0 | 5.8 | 5.9 | 4.4 | 7.7  | 5.6 | 4.2 | 7.4  | 1.7  | 0.12  | 1.40 | 0.92 | 2.15 |
| Tennessee      | 1.9 | 1.2 | 3.1 | 3.9 | 3.0 | 5.2  | 2.6 | 1.6 | 4.1  | 2.0  | 0.007 | 2.04 | 1.17 | 3.55 |
| Texas          | 6.4 | 4.6 | 8.8 | 5.8 | 4.6 | 7.4  | 6.0 | 4.6 | 7.7  | -0.5 | 0.68  | 0.92 | 0.61 | 1.37 |
| Utah           | 1.8 | 1.1 | 2.8 | 3.1 | 2.4 | 4.1  | 3.4 | 2.6 | 4.3  | 1.4  | 0.02  | 1.77 | 1.05 | 2.98 |
| Vermont        | 7.1 | 5.7 | 8.8 | 7.3 | 6.2 | 8.7  | 8.5 | 6.9 | 10.3 | 0.3  | 0.79  | 1.04 | 0.78 | 1.37 |
| Virginia       | 6.5 | 4.9 | 8.7 | 5.5 | 4.3 | 7.0  | 8.8 | 6.5 | 11.7 | -1.0 | 0.38  | 0.84 | 0.58 | 1.23 |
| Washington     | 4.2 | 3.3 | 5.4 | 6.1 | 5.4 | 6.9  | 6.0 | 5.2 | 7.0  | 1.9  | 0.003 | 1.46 | 1.11 | 1.92 |
| West Virginia  | 2.5 | 1.6 | 3.7 | 4.4 | 3.2 | 6.0  | 3.4 | 2.4 | 4.8  | 1.9  | 0.03  | 1.79 | 1.07 | 3.00 |
| Wisconsin      | 7.0 | 5.3 | 9.2 | 9.2 | 7.6 | 11.1 | 6.9 | 5.2 | 9.1  | 2.2  | 0.09  | 1.32 | 0.94 | 1.84 |
| Wyoming        | 3.1 | 2.2 | 4.4 | 4.7 | 3.7 | 5.9  | 5.4 | 4.1 | 7.1  | 1.5  | 0.05  | 1.49 | 0.98 | 2.26 |

CI = confidence interval

\*Heavy alcohol use defined as >14 drinks per week for males and >7 drinks per week for females. Respondents missing data on alcohol were excluded.

†P-values were based on 2-sided Wald Chi-Squared test

‡Data are not available.

Supplementary Figure

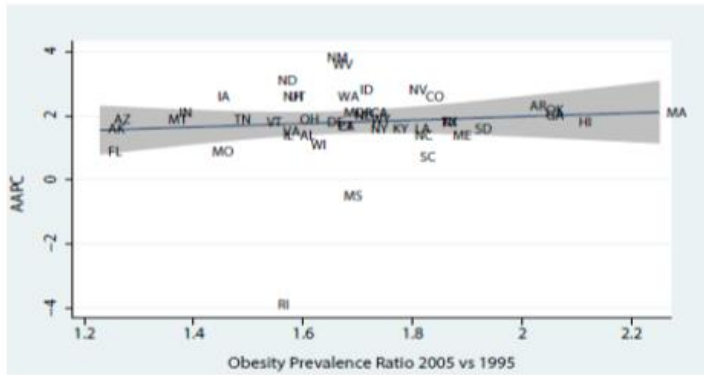

$r = 0.1, P = 0.47$

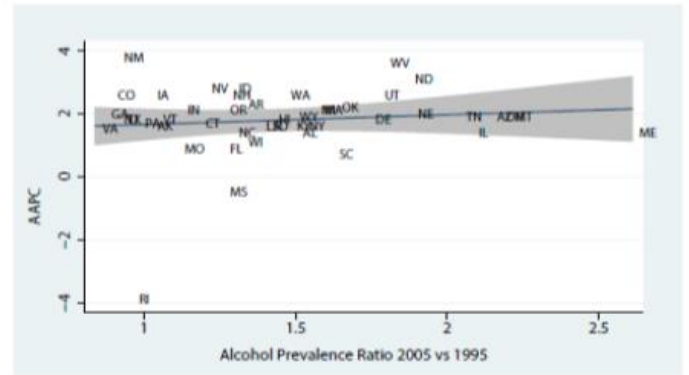

$r = 0.1, P = 0.45$

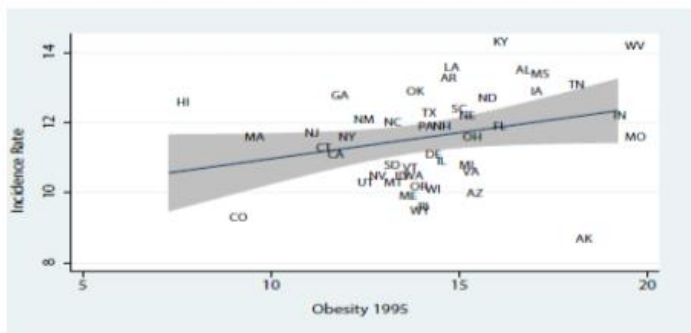

$r = 0.3, P = 0.06$

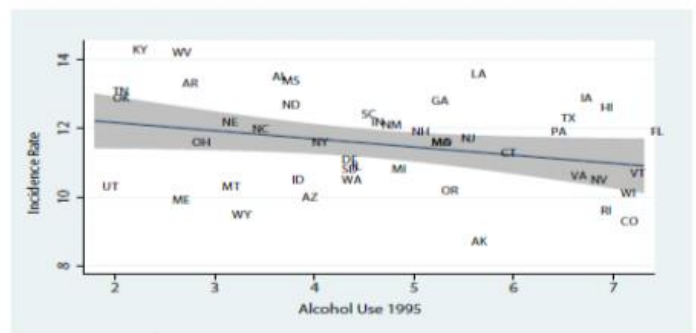

$r = -0.3, P = 0.06$

— Fitted values  
 ■ 95% Confidence interval

**Supplementary Figure 1. Correlation between colorectal cancer incidence and obesity prevalence (left) and heavy alcohol consumption (right) among non-Hispanic white adults aged 20-49 years.** AAPC = Average Annual Percent Change in colorectal cancer incidence rates during 2006-2015. Pearson correlation coefficient with corresponding two-sided P-values were calculated using STATA version 14.1.
